# Supplementary material for: Tumor‐Derived Peptidoglycan Recognition Protein 2 Predicts Survival and Antitumor Immune Responses in Hepatocellular Carcinoma
Source: PubMed Central journal article supplement — Hepatology. 2020 Jan 24;71(5):1626–42. doi: 10.1002/hep.30924 (PMC7318564; doi:10.1002/hep.30924), 2020-01-24
Supplement: HEP-71-1626-s001.pdf [file HEP-71-1626-s001.pdf]

**Figure S1**

**A**

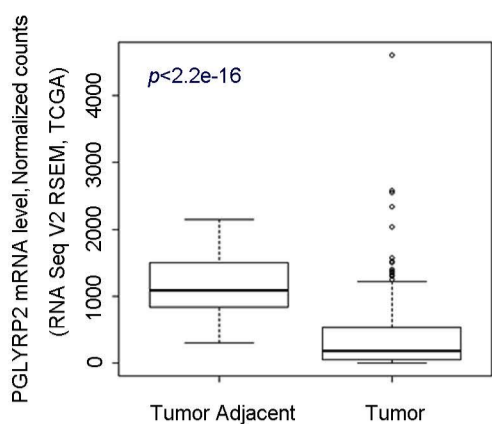

**E**

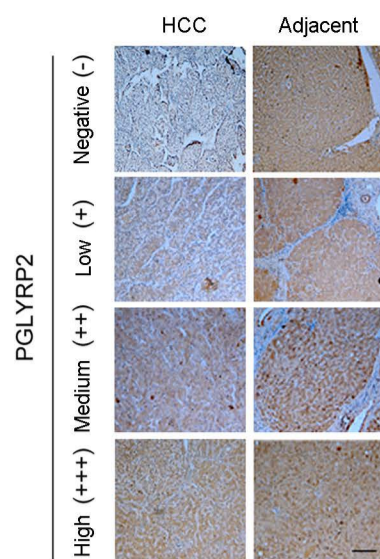

**B**

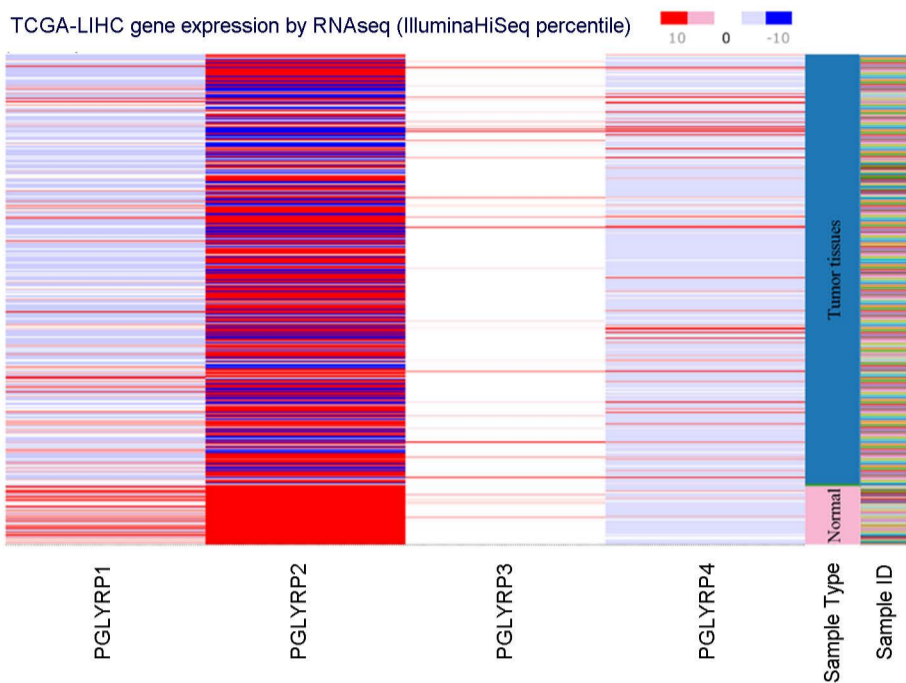

**C**

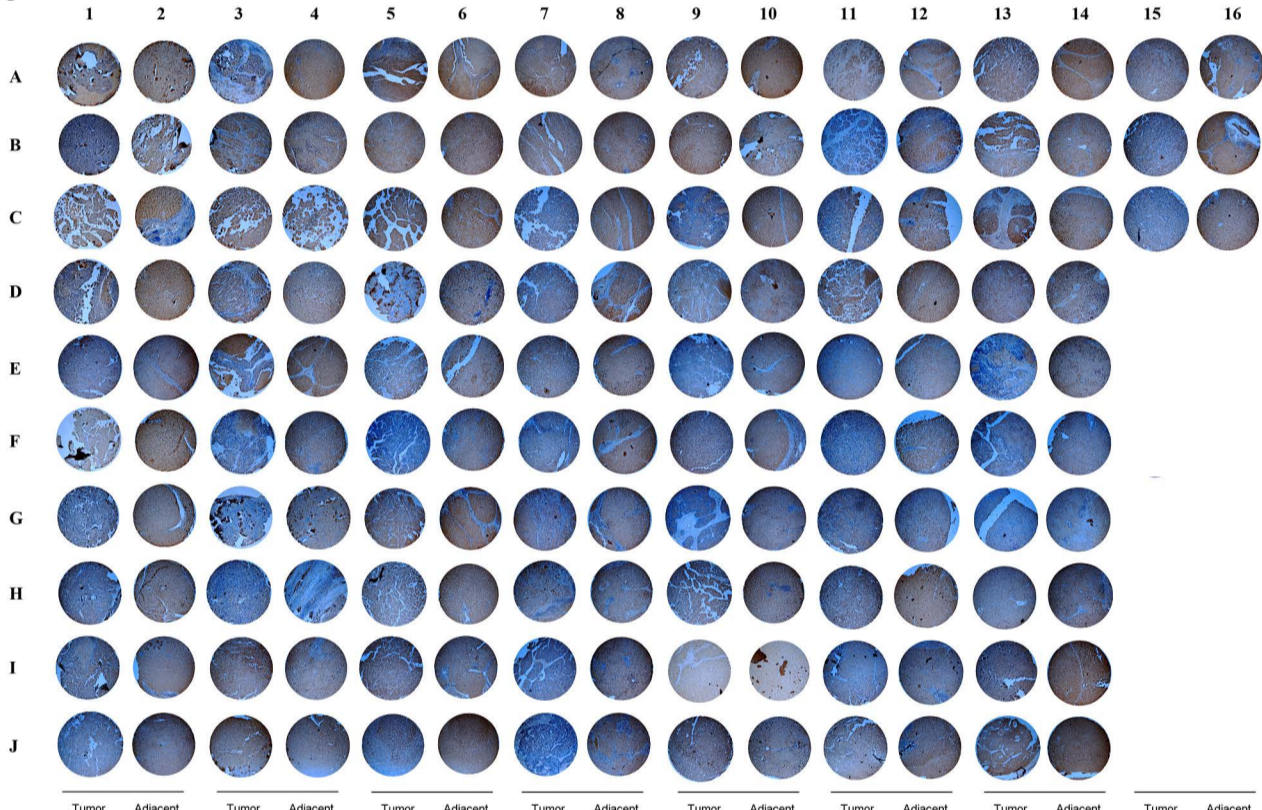

**D**

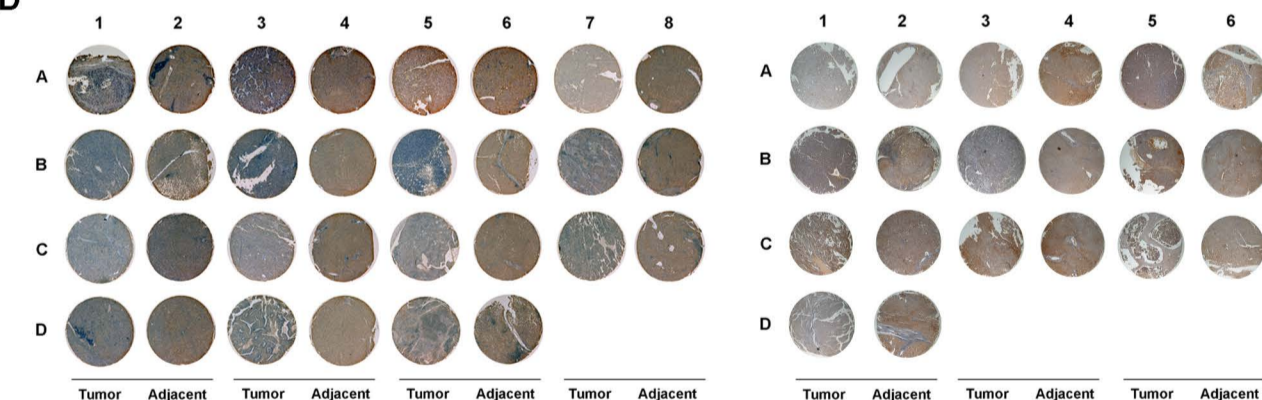

**F**

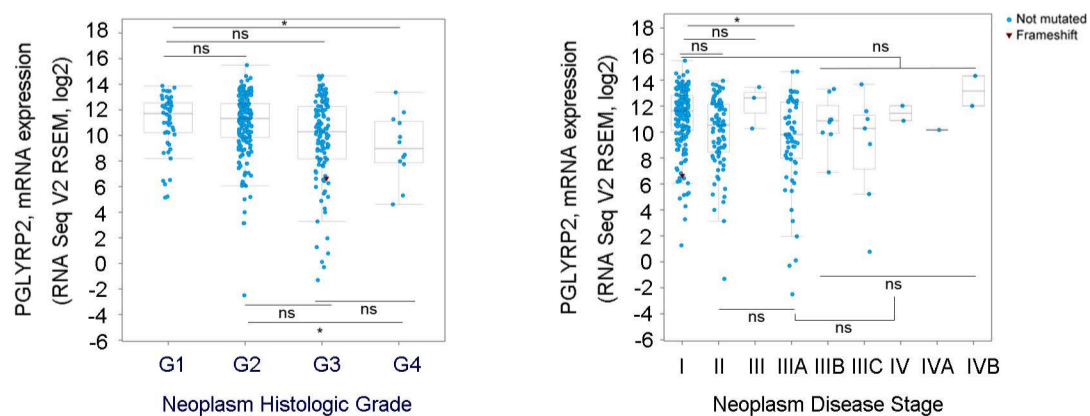

**G**

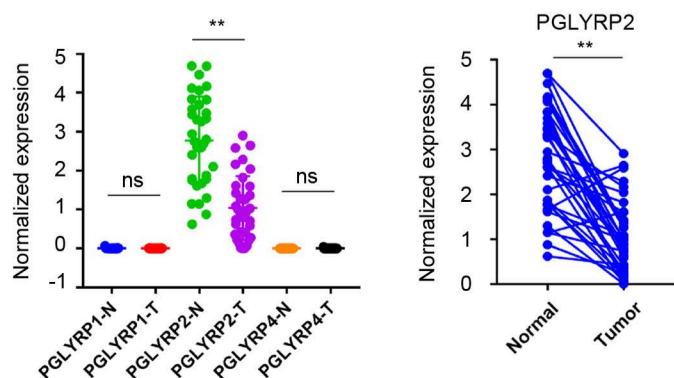

**Figure S2**

**A**

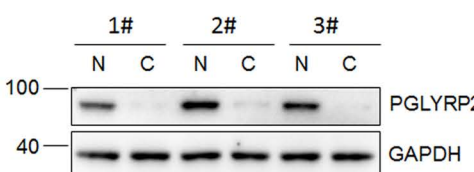

**B**

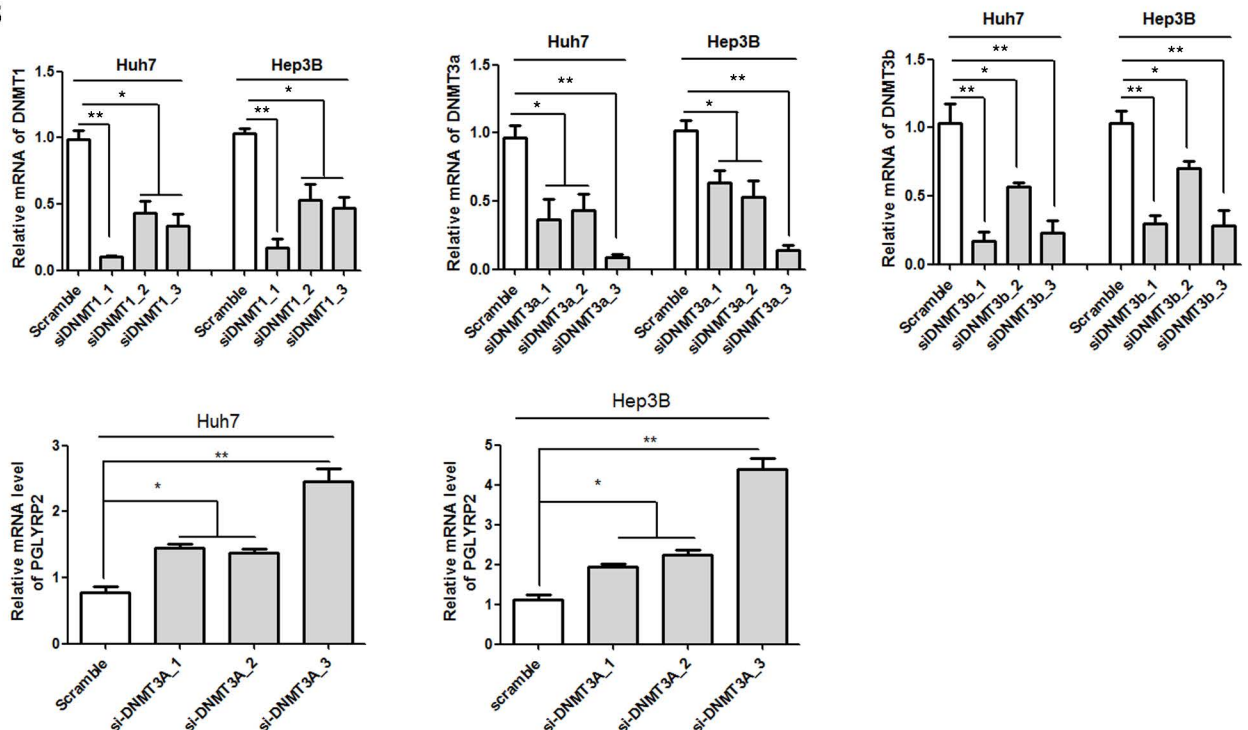

**C**

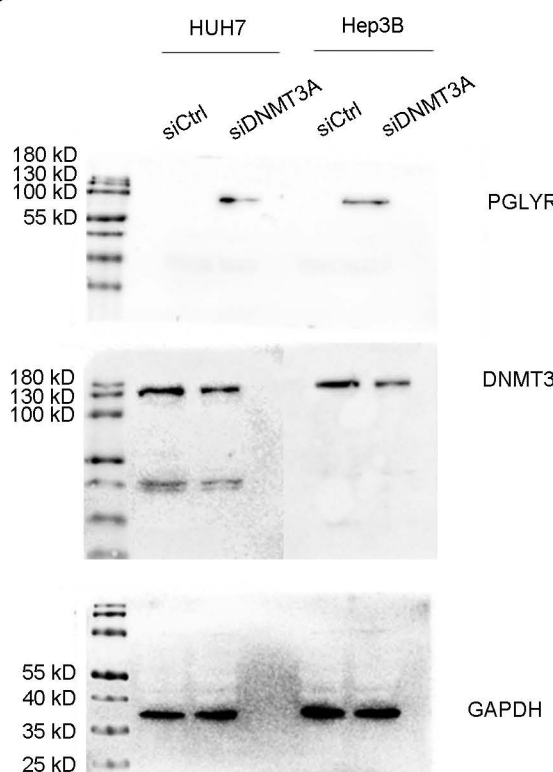

**D**

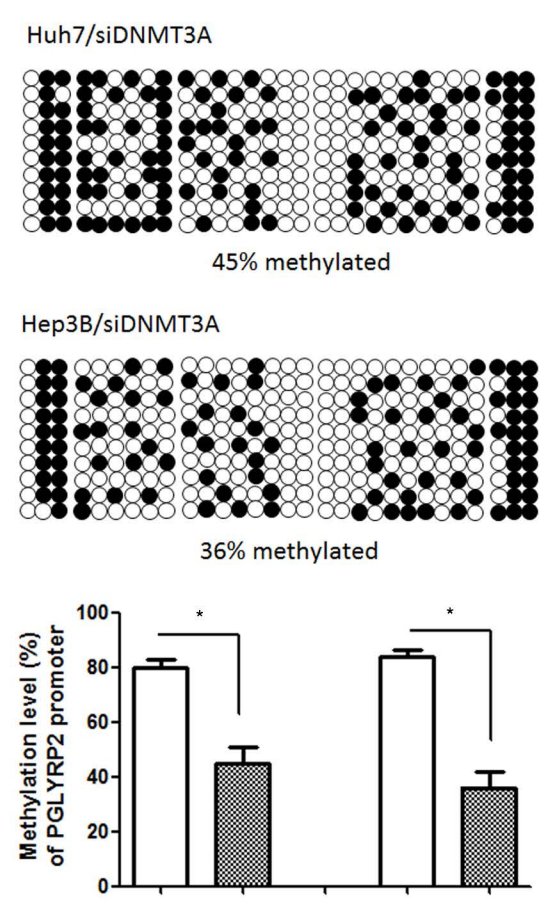

**E**

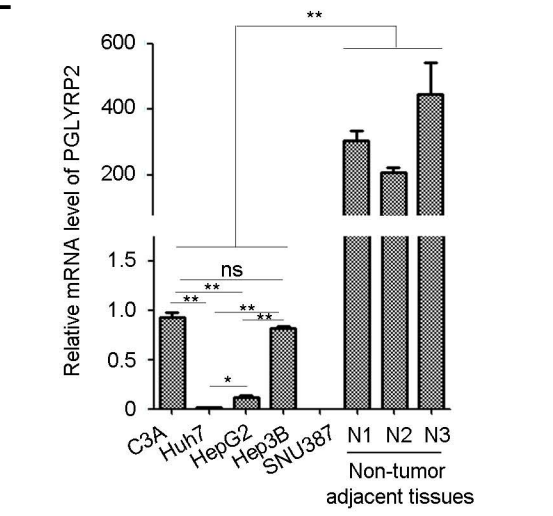

**F**

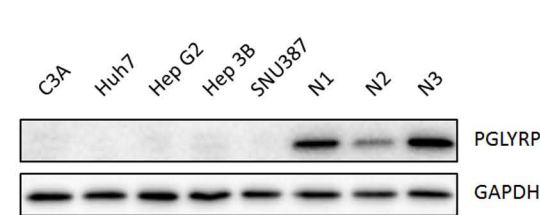

**G**

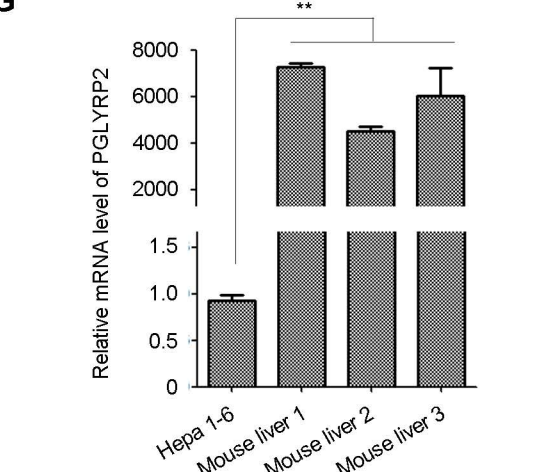

**H**

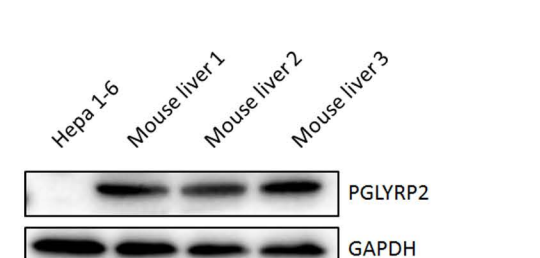

**I**

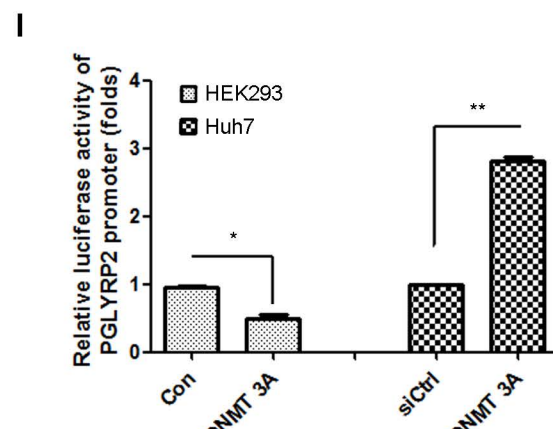

**K**

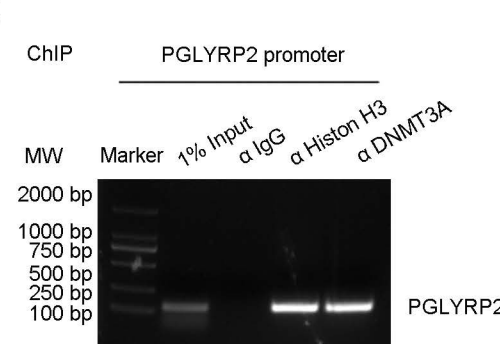

**J**

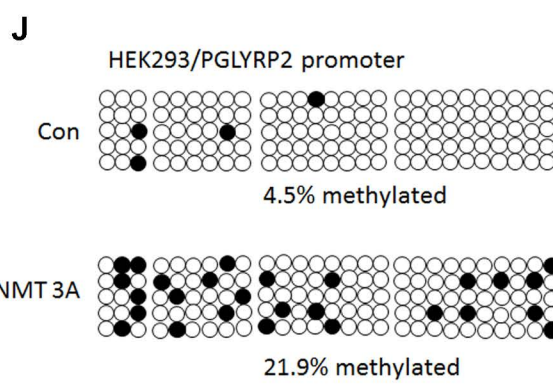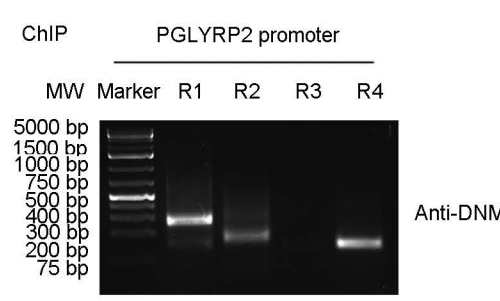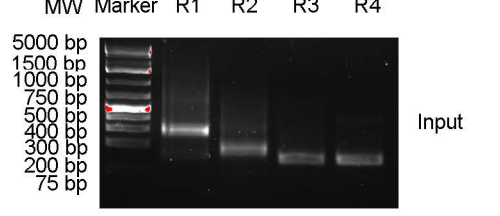

**Figure S3**

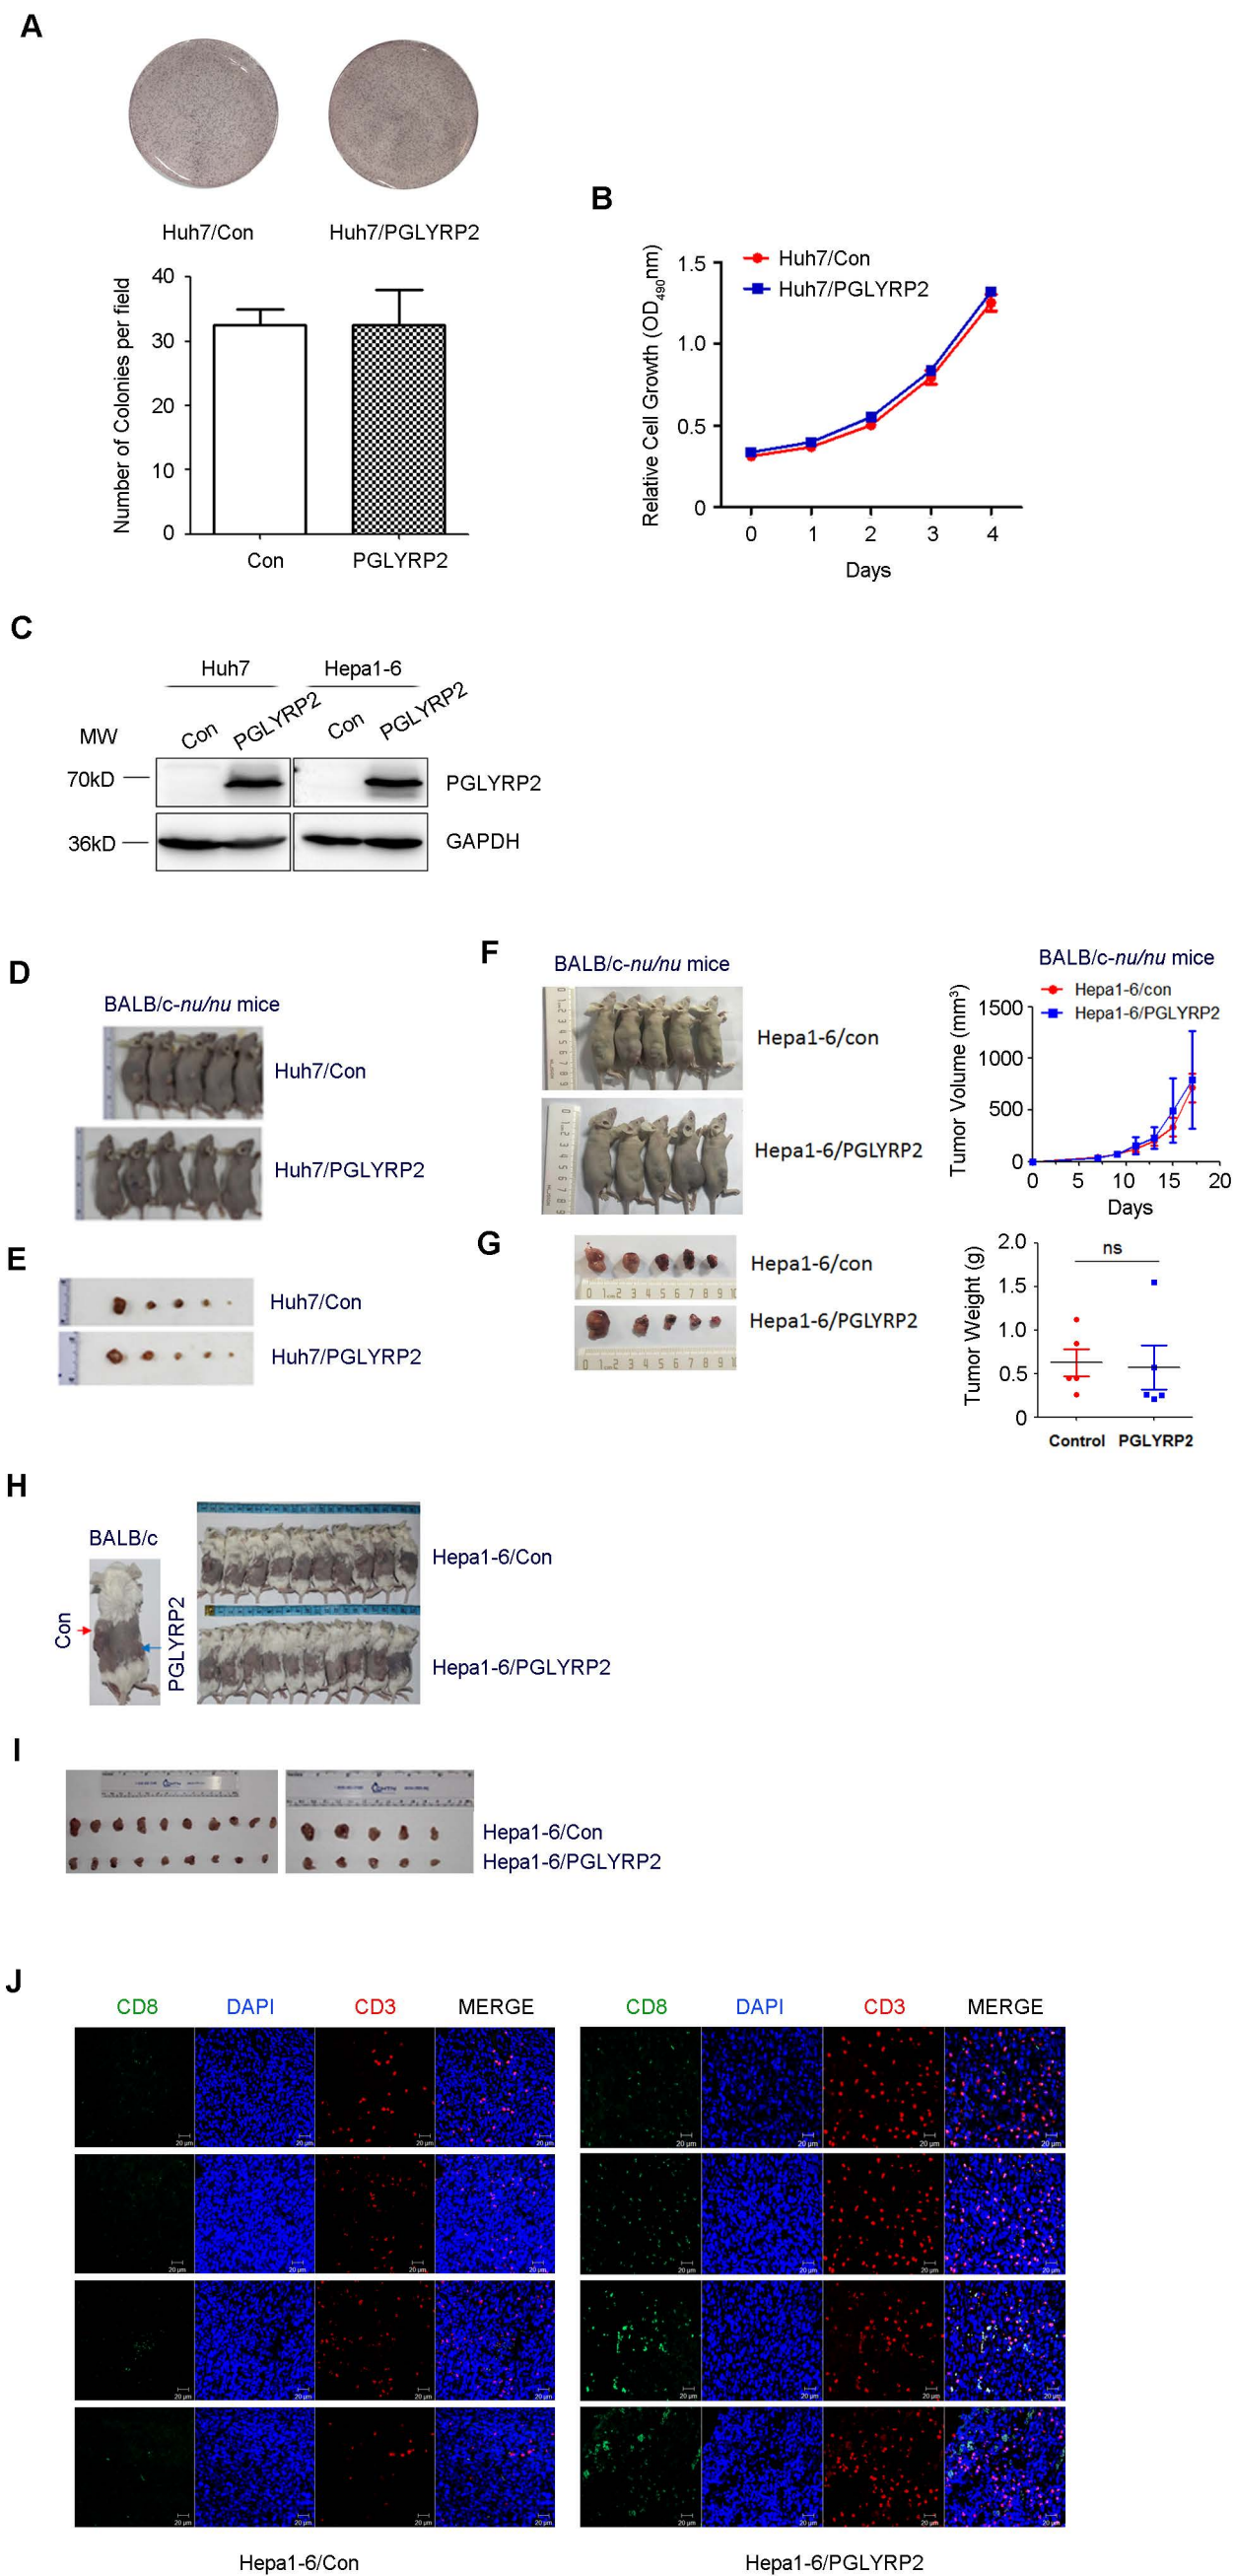

**Figure S4**

**A**

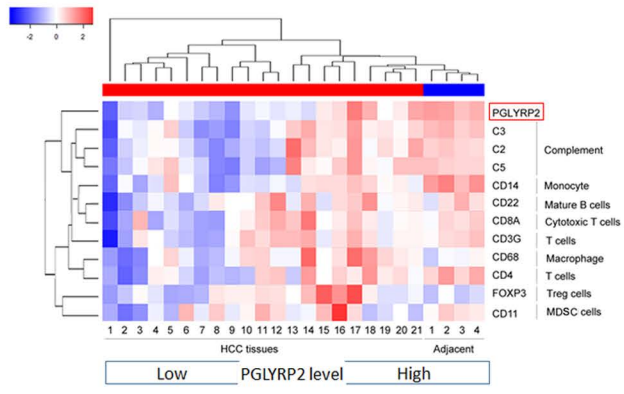

**B**

TCGA-LIHC (RNA Seq V2 RSEM)

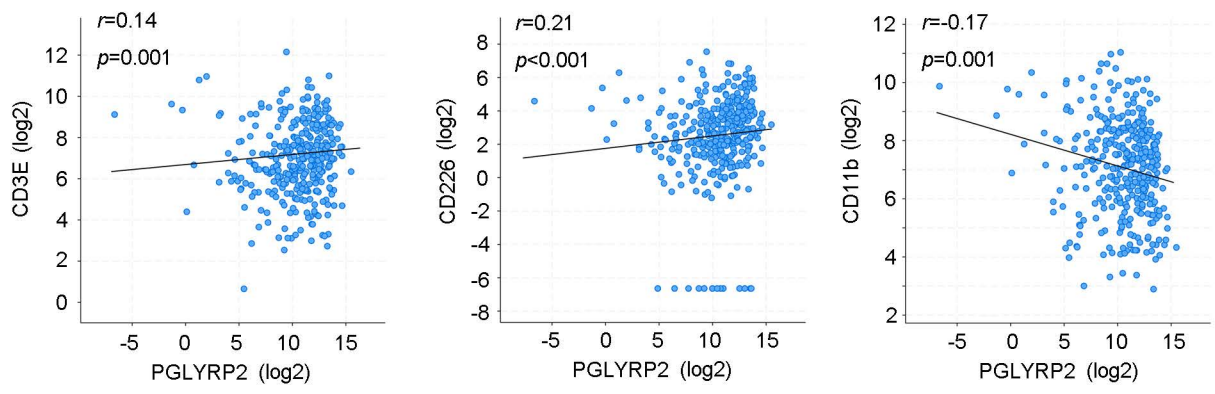

**C**

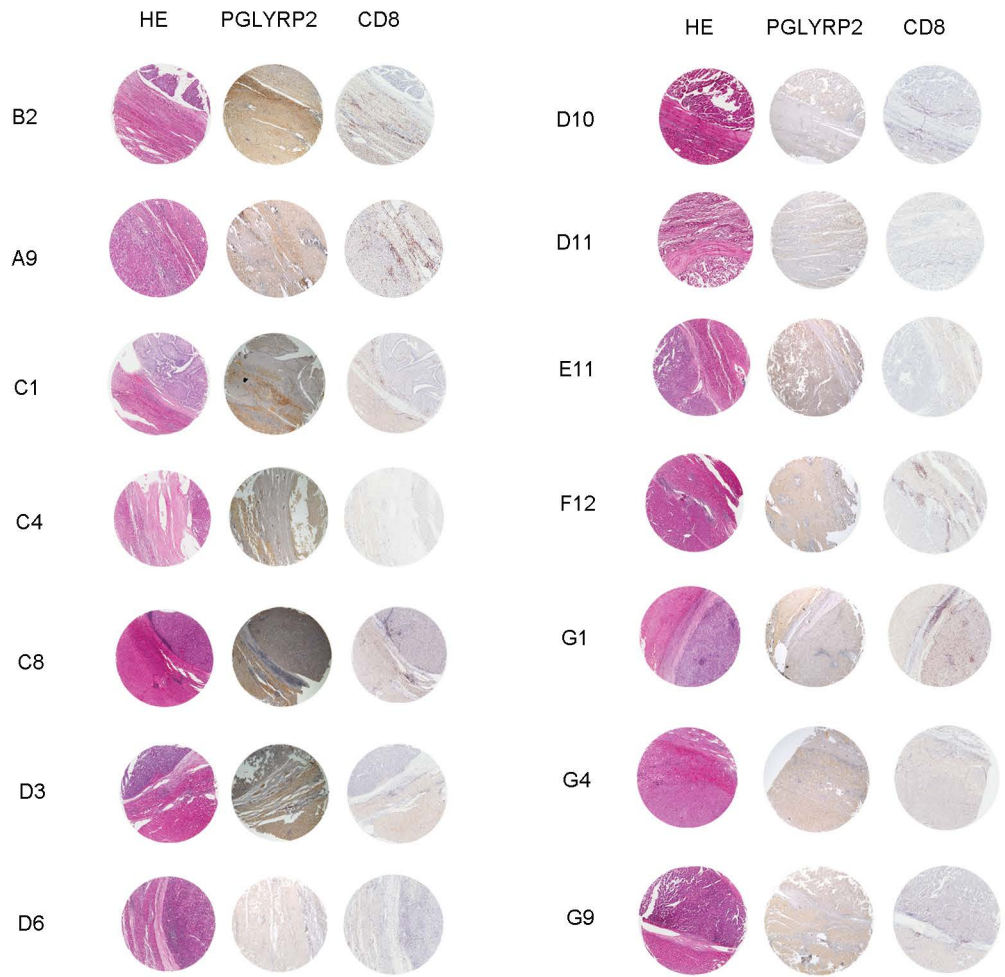

**Figure S5**

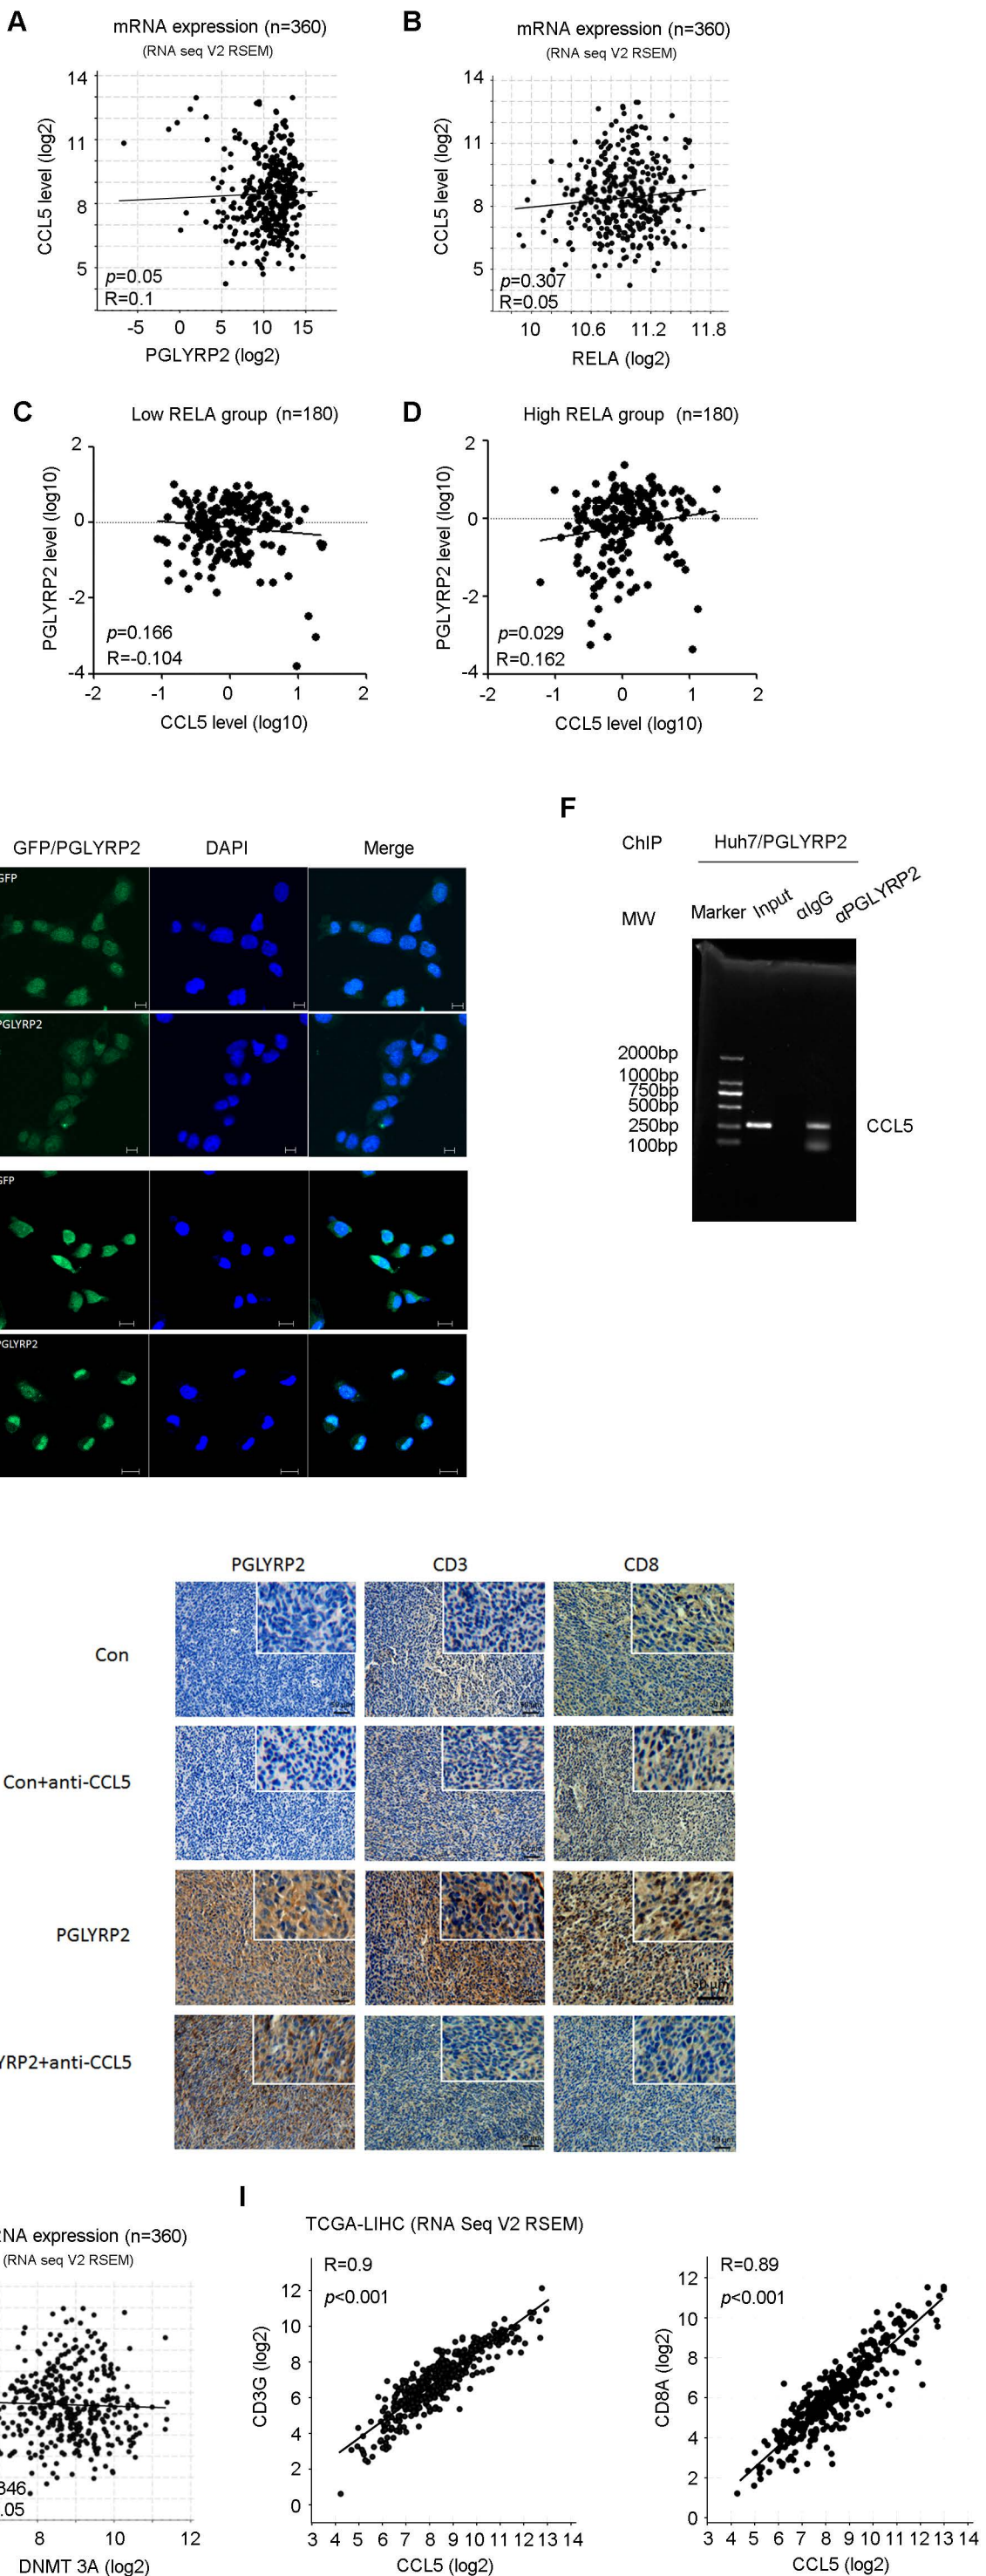

# Figure S6

**A**

Hepa 1-6/PGLYRP2

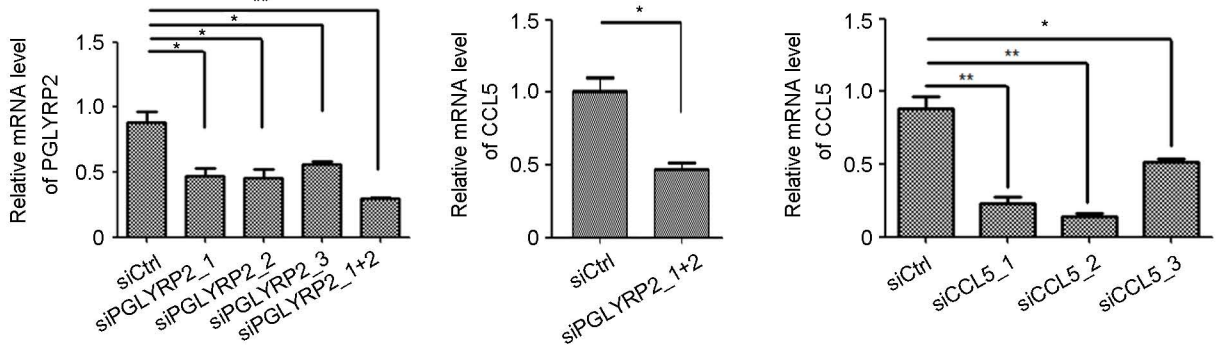

**B**

HuH7/PGLYRP2

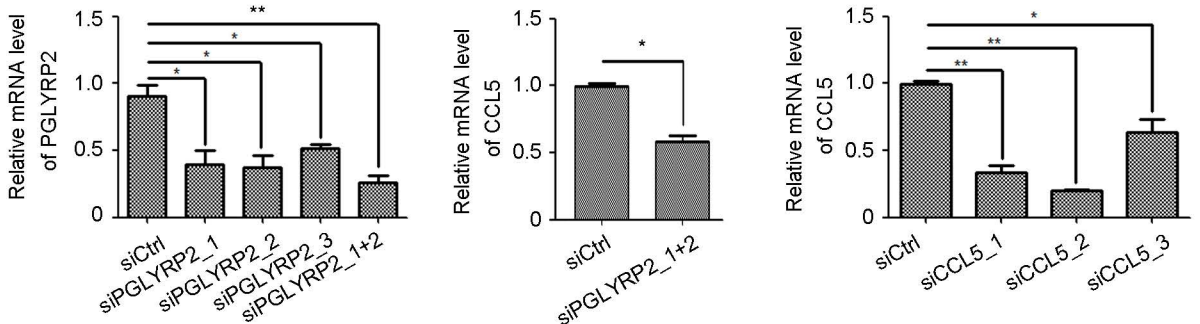

**C**

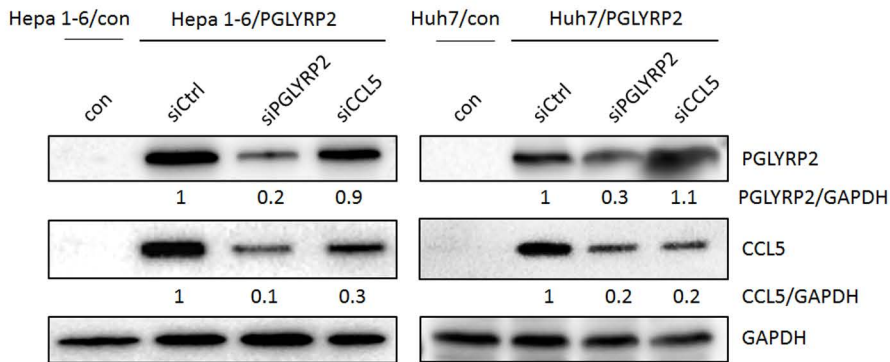

**D**

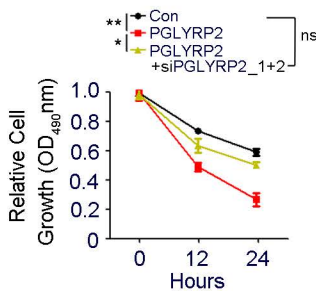

**E**

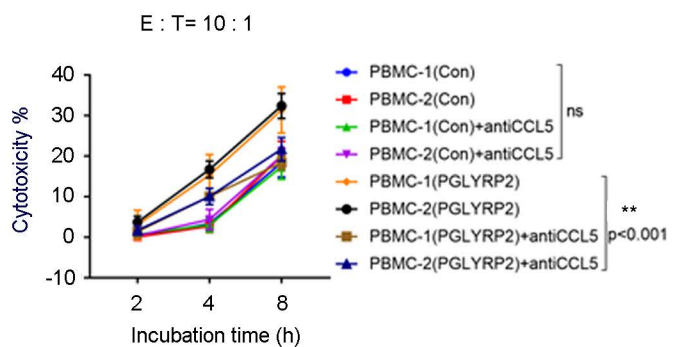

**F**

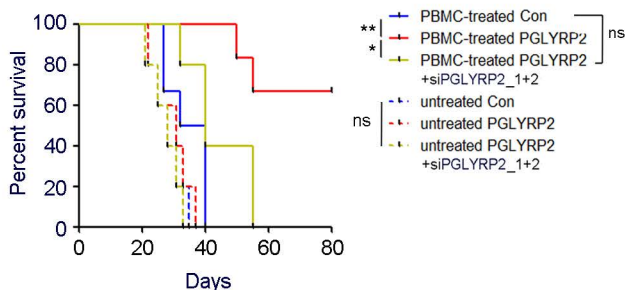

**Figure S7**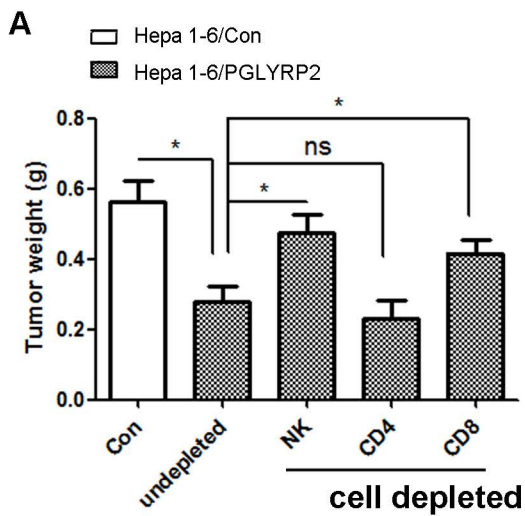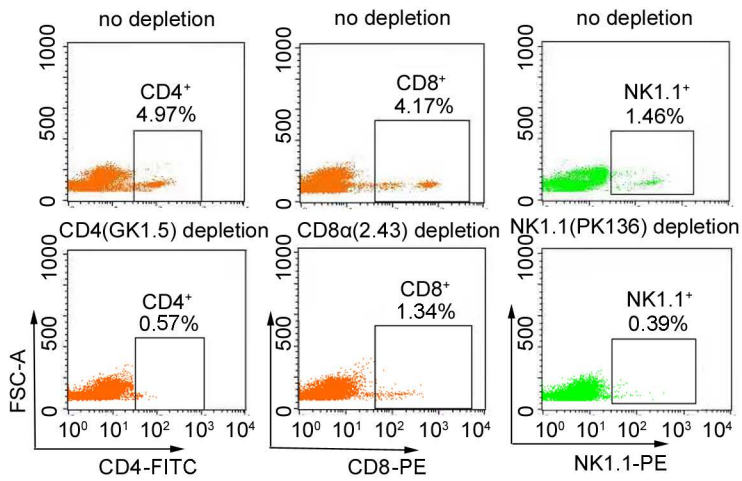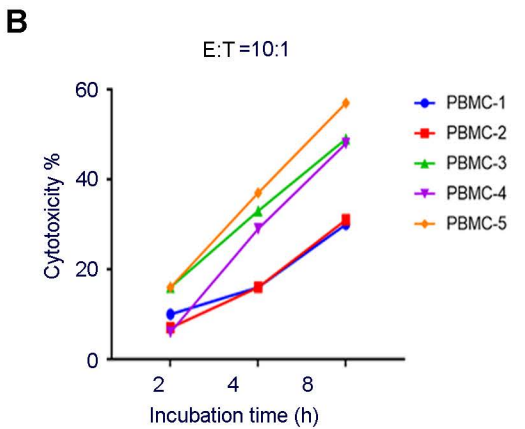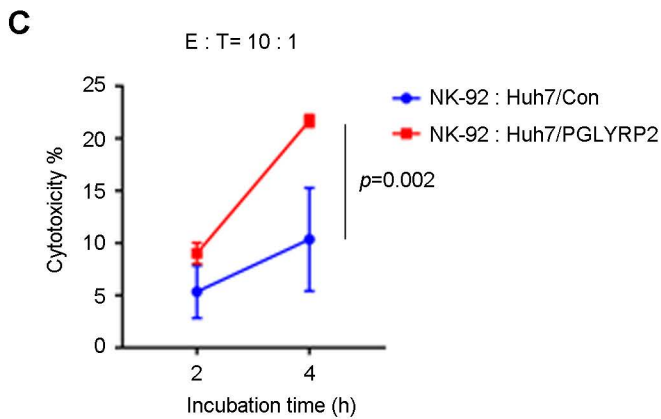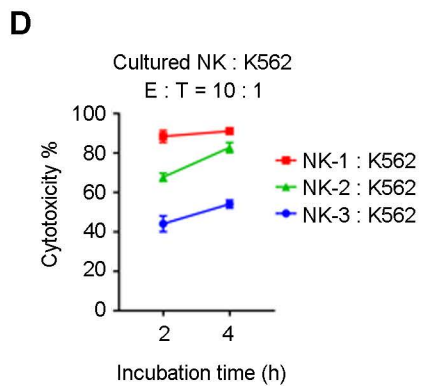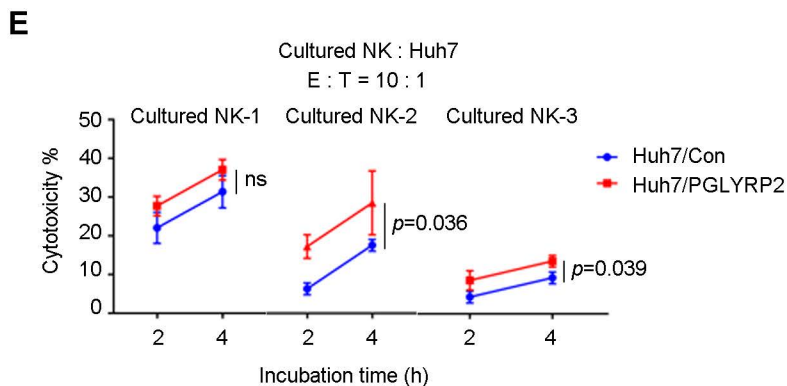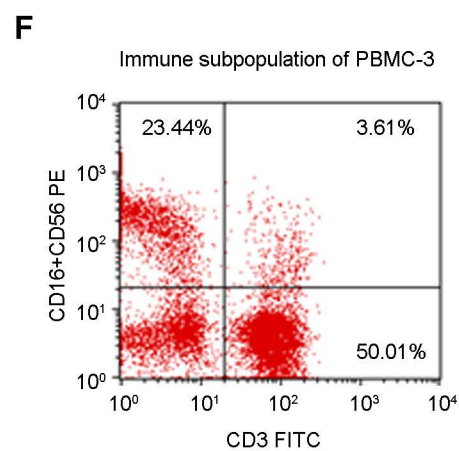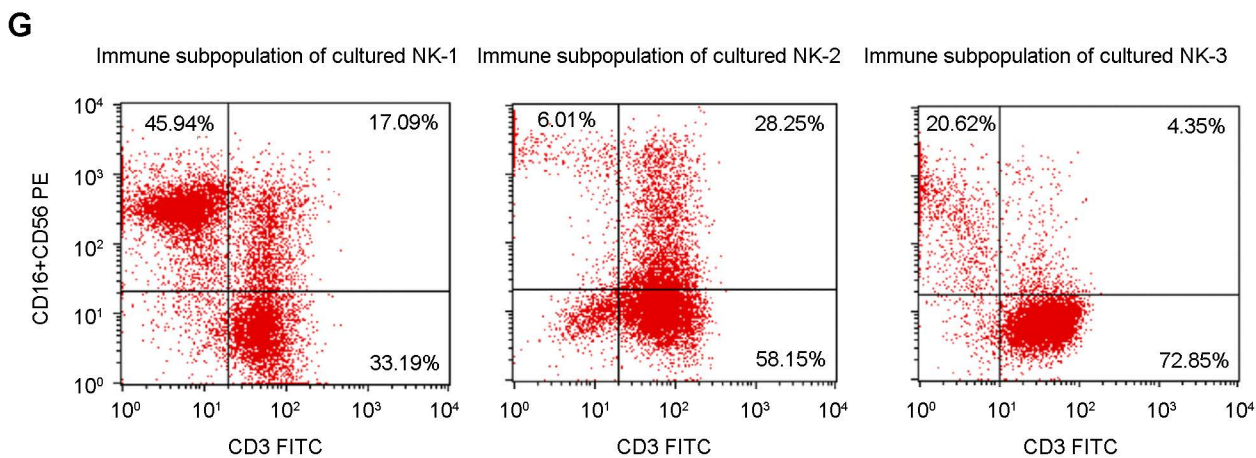

**Figure S8**

**A**

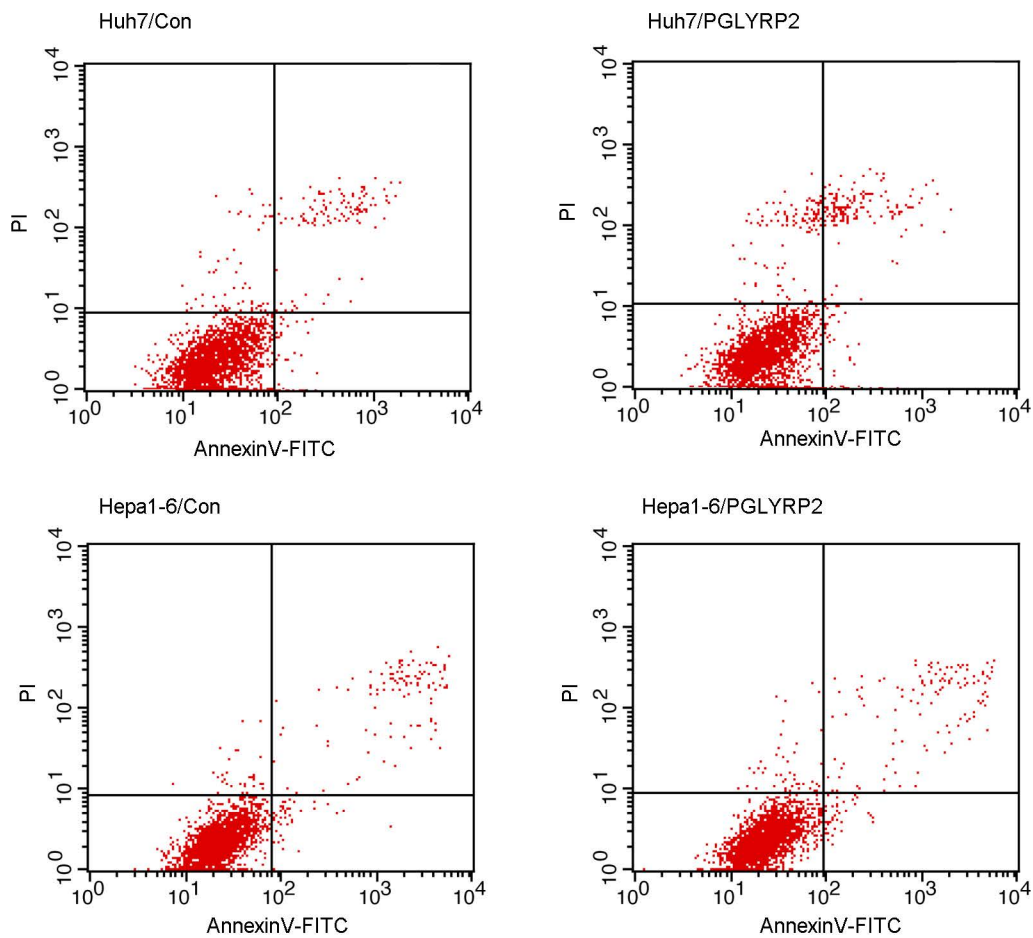

**B**

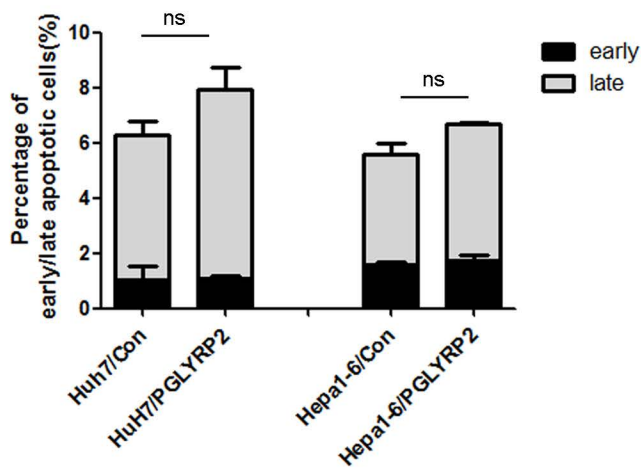



**Tumor-Derived PGLYRP2 Predicts Survival and Antitumor Immune  
Responses in Hepatocellular Carcinoma**

Zongyi Yang, Jia Feng, Li Xiao, Xi Chen, Yuanfei Yao, Yiqun Li, Yu Tang, Shuai  
Zhang, Min Lu, Yu Qian, Hongjin Wu\* & Ming Shi\*

Table of contents

|                                                |    |
|------------------------------------------------|----|
| Supplementary methods.....                     | 2  |
| Supplementary information, Figure Legends..... | 9  |
| Supplementary information, Table S1.....       | 16 |
| Supplementary information, Table S2.....       | 17 |
| Supplementary information, Table S2.....       | 27 |
| References.....                                | 29 |

## **Supplementary Methods**

### **Patient samples**

Ninety-eight paired tumor-adjacent non-cancerous liver tissues and HCC tissue samples and additional fourteen HCC tissues were from human liver cancer tissue array HLiv-HCC180Sur-01, Hliv-HCC030PG-01, HLivH090Su01 and OD-CT-DgLiv02-005 (Outdo Biotech, Shanghai, China). Twenty-two paired cDNA of HCC tissues and their corresponding adjacent non-tumor tissues were from human liver cancer cDNA array cDNA-HlivH60PG02 (Outdo Biotech, Shanghai, China). The collection of three HCC samples used for bisulfite sequencing, patient consent, and patient recruitment followed Institutional Review Board protocols from the First Affiliated Hospital of Kunming Medical University. The clinical information of these liver cancer tissues were listed in Table S2. The study has been approved by the Research Ethics Committee of Harbin Institute of Technology and the First Affiliated Hospital of Kunming Medical University.

### **Chemokine analysis**

The tissue lysates of high PGLYRP2-expressing HCC tissue and low PGLYRP2-expressing HCC tissue were obtaining by homogenizing tissue in homogenization buffer (10 mM HEPES-KOH (pH 7.6), 25 mM KCl, 0.15 mM spermine, 0.5 mM spermidine, 2 M sucrose, 10% (v/v) glycerol, 1 mM EDTA

(pH 8.0)). Cell culture supernates of Huh7/Con and Huh7/PGLYRP2 were harvested after 24 h of culture and frozen at  $-80^{\circ}\text{C}$  until further analyses. Sample protein concentration was quantified using BCA protein concentration determination kit (Beyotime, Jiangsu, China). The concentrations of chemokines were measured with a human chemokine array kit (R&D Systems, Minneapolis, MN, USA) according to the manufacturer's instructions.

### **Human tumor xenograft, immune-competent syngeneic murine tumor model and orthotopic HCC mouse model**

All animal procedures were performed according to protocols approved by the Rules for Animal Experiments published by the Chinese Government (Beijing, China) and approved by the Research Ethics Committee of Harbin Institute of Technology, China. Animals were housed in micro-isolator cages, including a wire rack in the cage for holding food and a water bottle. Animals were housed on a 12 h light/dark cycle. PGLYRP2-transfected human hepatoma cell line HuH7 stable cells and control cells were injected intraperitoneally or subcutaneously into the right posterior flanks of 6-week-old BALB/c nude mice (female, five mice per group). PGLYRP2-transfected mouse hepatoma cell line Hepa 1-6 stable cells and control cells were injected subcutaneously into the right posterior flanks of 6-week-old immune-competent BALB/c mice (female, ten mice per group). Tumor growth was assessed using standard caliper measurement twice a week. The following formula was used to calculate tumor

volume: Tumor volume (mm<sup>3</sup>)=(tumor length × width<sup>2</sup>)/2, with all measurements in mm. Following 25-40 days of treatment, mice were sacrificed and tumor tissues were harvested. Then the subcutaneous tumor was cut into cubes 1 mm<sup>3</sup> in size, and implanted into the liver of each group respectively to mimic the primary HCC (6 mice in each group). After 2 weeks of implantation, the mice were sacrificed, and the size of tumors was calculated and compared as mentioned above.

### **Quantitative real-time PCR and Western blot analysis**

Quantification of mRNA level was performed in a 20 µl mixture consisted of 10 µl 2×SYBR Green Mix, 0.2 ml RT product, 1 µl primer set mix at a concentration of 5 pmol/ml for each primer and 8.8 µl sterile water. As internal control, GAPDH mRNA was performed in same condition except the primer. The experiment was set on ABI 7500 Real-time PCR System (Foster City, CA, USA), PCR program was according to protocol's recommendation (10 minutes at 95 °C for 1 cycle, 10 seconds at 95 °C, 34 seconds at 60 °C and 30 seconds at 72 °C for 40 cycles, 10 minutes at 72 °C for 1 cycle). Primers for qPCR are described in Supplementary Table S3.

Cells were collected and lysed in RIPA lysis buffer (150 mm NaCl, 50 mm Tris (pH 8.0), 0.5 mm EDTA, and 1% Nonidet P-40) plus complete protease inhibitor mixture (Roche Applied Science, Indianapolis, USA). The protein levels were determined using western blot analysis, as previously reported(1).

## **Immunohistochemical analysis and Immunofluorescence Staining**

The immunohistochemical staining was performed as described previously(2). Antibody against PGLYRP2 (#NBP2-32042) was purchased from Novus Biologicals. Immunofluorescence staining was performed as described previously(1). For the analysis of T cell infiltration in the paraffin-embedded tumor tissue, immunofluorescence staining of T cells was performed. Primary antibodies against mouse CD3 and CD8 (Cell Signaling Technology, Massachusetts, USA) were used. The secondary antibodies used were goat anti-rabbit IgG and anti-rat IgG (Invitrogen, Carlsbad, CA, USA). Images were analyzed with a Zeiss Axioskop-2 microscope. 488 and 633 nm wavelength lasers were used to excite Fluorescein tags. DAPI was excited by UV light.

## **Bisulfite DNA sequencing**

Bisulfite DNA sequencing was conducted as described previously.(2) Briefly, bisulfite modification of DNA was performed by following the protocol of Applied Biosystems methylSEQr Bisulfite Conversion kit. Bisulfite-treated DNA was amplified using nest PCR with primers described in Supplementary information, Table S3. Amplified bisulfite-treated DNA was sequenced and compared with original sequence of *PGLYRP2* gene.

## ***In vivo* mAb treatment**

Mice were injected intraperitoneally or subcutaneously with various amounts of

antibodies. Immune cell subsets were depleted by intraperitoneally administering 200 µg of depleting antibody i.p. twice weekly beginning one day prior to experiments as indicated: CD8 T-cells with anti-CD8α (clone 2.43, BioXCell, West Lebanon, NH, USA), CD4 T-cells with anti-CD4 (clone GK1.5, BioXCell, West Lebanon, NH, USA), NK cells with anti-NK1.1 (clone PK136, BioXCell, West Lebanon, NH, USA). CCL5 was blocked by intratumoral administering 20 µg of anti-CCL5 blocking antibody (53405.111, ab10394, Abcam, Cambridge, UK) at 3<sup>rd</sup>, 5<sup>th</sup> and 7<sup>th</sup> day after tumor injection.

### **Luciferase assay and MTT assay**

Luciferase assay was performed as described previously(1). Cells were transfected with promoter luciferase reporter plamids using Lipofectamine 2000 (Invitrogen, Carlsbad, CA, USA). Luciferase assays were performed by using the luciferase assay system (Promega, Madison, WI, USA); b-Galactosidase activity was used as an internal control. Luciferase activity was measured by using CytoFluorplate 4000 Luminescence Microplate Reader (ABI, Foster City, CA, USA).

Cell viabilities were assessed by a MTT [3-(4,5-dimethylthiazol-2-yl) -2,5-diphenyltetrazolium bromide] (Sigma-Aldrich, Milwaukee, USA) assay. Briefly, MTT solution in DMEM containing 10% FBS was added to each well at the final concentration of 0.5 mg/mL. The cells were incubated for 4 h at 37°C. The MTT medium was aspirated and then 100 µl dimethylsulfoxide (DMSO, Sigma-

Aldrich, Milwaukee, USA) was added. Optical density was measured with a spectrometer at 490 nm. Each experiment was conducted in triplicates and repeated independently for 3 times.

### **Cell viability and cell cytotoxicity assays**

Cell viability was assessed by the MTT Cell Viability Assay Kit (Beyotime, Jiangsu, China). Cell cytotoxicity of PBMCs was assessed by measuring fluorescence intensity of green-fluorescent Calcein AM (#C3099; Thermo Fisher Scientific, Waltham, MA, USA) in intact tumor cells. Briefly, target cells (tumor cells) were resuspended with DMEM medium containing 10% FBS, and mixed with 20  $\mu$ l Calcein AM at 37°C, 30min for staining. PBMCs were co-cultured with pre-stained target cells at a certain E:T ratio for 2 h, 4 h or 8 h of incubation time. The fluorescence intensity of living target cells is measured by using Terascan VPC instrument (Minerva Tech, Tokyo, Japan). Percent cytotoxicity of the assay was calculated by the following formula: % cytotoxicity =  $(1 - [(average\ fluorescence\ of\ the\ sample\ wells - average\ fluorescence\ of\ the\ maximal\ release\ control\ wells) / (average\ fluorescence\ of\ the\ minimal\ release\ control\ wells - average\ fluorescence\ of\ the\ maximal\ release\ control\ wells)]) \times 100$  (3).

### **Chromatin Immunoprecipitation (CHIP)**

CHIP assay was performed as described previously(4).  $1 \times 10^7$  Huh7 cells were

cross-linked with 1 % formaldehyde for 10 min and then neutralized with 125 mM glycine for 5 min. Cells were collected by centrifugation (2,000 g for 5 min at 4 °C) and washed twice with ice-cold PBS. Cells were lysed in 150 µl Buffer A (10 mM Tris–HCl, pH 8.0, 10 mM NaCl, 0.2 % NP40) for 10 min on ice and cell pellet was collected and resuspended in 1 ml Buffer B (50 mM Tris–HCl, pH 8.0, 10 mM EDTA, 1 % SDS). The lysate was fragmented by sonication to yield fragments between 500 bp and 1000 bp, and then centrifuged at 13,000 g for 15 min at 4°C. The supernatant was whole cell lysates. 5 µg of antibody against Histon H3, DNMT 3A or PGLYRP2 (Abcam, Cambridge, MA) was added into the tubes containing 200 µl whole cell lysate plus 300 µl Buffer C (16.7 mM Tris–HCl, pH 8.0, 167 mM NaCl, 1.2 mM EDTA, 0.01 % SDS, 1.1 % Triton X-100). After incubation for 4 h, the antigen-antibody complexes were collected with protein A agarose beads and subjected to serial washes. Cross-linked chromatin was reversed at 65°C in the presence of 200 mM NaCl for 5 h. The DNA fragments were then purified using chloroform-isoamyl alcohol, and were amplified by using PCR with specific primers (Table S3). PCR products were then run on agarose gel and photographed.



## Supplementary information, Figure Legends

**Fig. S1 PGLYRP2 level is decreased in HCC tissues and the downregulated level of PGLYRP2 correlates with poor prognosis in patients with HCC.** (A) PGLYRP2 mRNA levels were analyzed in tumor-adjacent non-cancerous liver tissues and HCC tissues from TCGA-LIHC. (B) mRNA levels of PGRP family members were analyzed in tumor-adjacent non-cancerous liver tissues and HCC tissues from TCGA-LIHC. (C, D) Expression levels of PGLYRP2 protein in 73 paired tumor-adjacent non-cancerous liver tissues and HCC tissue samples from human liver cancer tissue array Hliv-HCC180Sur-01 (C), 15 paired tumor-adjacent non-cancerous liver tissues and HCC tissue samples from human liver cancer tissue array Hliv-HCC030PG-01 (left panel, D) and 10 paired tumor-adjacent non-cancerous liver tissues and HCC tissue samples from human liver cancer tissue array OD-CT-DgLiv02-005 (right panel, D) were evaluated using immunohistochemistry assay. (E) Immunohistochemistry results showed different intensities of PGLYRP2 protein expression in paired tumor-adjacent non-cancerous liver tissues and HCC tissues. (F) The relationship between PGLYRP2 level and neoplasm grades (left), stages (right) in patients of TCGA-LIHC were analyzed. (G) Relative protein levels of PGLYRP1, PGLYRP2 and PGLYRP4 in HCC tissues and tumor-adjacent non-cancerous liver tissues were analyzed according to the LC-MS/MS-based proteomic data from Chinese Human Proteome Project (CNHPP). The results are reported as mean  $\pm$  SEM. \*,  $p < 0.05$ ; \*\*,  $p < 0.001$ ; ns,

not significant.

**Fig. S2 DNMT3A-mediated promoter hyper-methylation results in downregulation of PGLYRP2 in HCC.** (A) The expression levels of PGLYRP2 in the three HCC tissues used for bisulfite sequencing were detected by Western blot. (B) The levels of DNMT 1, DNMT 3A, DNMT 3B and PGLYRP2 were detected in Huh7 and Hep3B transfected with scramble siRNA, DNMT 1 siRNA, DNMT 3a siRNA or DNMT 3b siRNA alone by using Real-time PCR. (C) The levels of PGLYRP2 and DNMT 3A in DNMT 3A knockdowned Huh7 or Hep3B cells were detected by Western blotting. (D) Methylation status of the PGLYRP2 promoter region was analyzed in Huh7/siDNMT 3A and Hep3B/siDNMT 3A cells. The methylation levels of PGLYRP2 promoter in Huh7, Huh7/siDNMT 3A, Hep 3B and Hep3B/siDNMT 3A cells were analyzed. (E, F) PGLYRP2 expression levels were detected in human HCC cell lines C3A, Huh7, HepG2, Hep3B, SNU387 by Real-time PCR (E) and Western blot (F). Three human non-tumor adjacent tissues acted as controls. (G, H) PGLYRP2 expression level was detected in mouse HCC cell line Hepa 1-6 by Real-time PCR (G) and Western blot (H). Three mouse normal liver tissues acted as controls. (I) Luciferase activity of PGLYRP2 promoter was detected in DNMT3A-overexpressed HEK293/PGLYRP2 promoter luciferase reporter cells and DNMT 3A-silenced Huh7cells. (J) The methylation status of the PGLYRP2 promoter region was analyzed in Con or DNMT3A-overexpressed

HEK293/PGLYRP2 promoter luciferase reporter cells. (K) The binding activity of DNMT1, DNMT3A and DNMT3B to PGLYRP2 promoter was assessed by ChIP assay in Huh7 cells. Four regions in PGLYRP2 promoter were chosen to analyze the DNMT3A binding regions in ChIP assay. The four regions of PGLYRP2 promoter were R1, -1741 to -1491; R2, -1516 to -1362; R3, -736 to -614; R4, -440 to -315. All the results are reported as mean  $\pm$  SEM. \*,  $p < 0.05$ ; \*\*,  $p < 0.001$ ; ns, not significant.

**Fig. S3 PGLYRP2 suppresses HCC progression in immunocompetent mice and promotes antitumor immune response.** (A) Cell colony formation assay was performed in Huh7/Con and Huh7/PGLYRP2 cells. Number of cell colonies was counted every 5 cm<sup>2</sup> field. (B) MTT assay was carried out in Huh7/Con and Huh7/PGLYRP2 cells. (C) PGLYRP2 expression in Huh7/PGLYRP2, Hepa1-6/PGLYRP2 and corresponding control cells was examined by Western blotting. (D, E) Human cancer cells Huh7/con or Huh7/PGLYRP2 were subcutaneously injected (s.c.) into BALB/*c-nu/nu* mice (D). Tumor weight was measured at 30 days after injection (E). (F, G) Murine cancer cells Hepa1-6/con or Hepa1-6/PGLYRP2 cells were inoculated s.c. in BALB/*c-nu/nu* mice (F). Tumor weight was measured at the end of the study (G). (H, I) Murine cancer cells Hepa1-6/con or Hepa1-6/PGLYRP2 cells were inoculated s.c. in immune-competent BALB/*c* mice (H). Tumor weight was measured at the end of the study (I). (J) Immunofluorescent staining of CD3 and

CD8 were performed on paraffin-embedded tumor tissue with Hepa1-6/Con or Hepa1-6/PGLYRP2. All the results are reported as mean  $\pm$  SEM. The ns indicates there is no significant difference.

**Fig. S4 PGLYRP2 expression level was correlated with tumor-infiltrating lymphocytes in HCC.** (A) The expression of PGLYRP2 and immune cell markers were detected in 22 HCC samples using RT-qPCR array assay. Heat map showed different expression of PGLYRP2 and immune cell markers in 22 HCC tissues. (B) The association between PGLYRP2 mRNA level and immune cell markers in TCGA-LIHC cohort was analyzed. The markers included CD3E (total T cells), CD226 (activated T cells, NK cells and NKT cells) and CD11b (MDSCs). (C) HE staining of 14 HCC samples and immunohistochemistry assays of PGLYRP2 and CD8 in HCC tissues were shown.

**Fig. S5 The association between CCL5 and PGLYRP2 level in HCC.** (A) The association between CCL5 and PGLYRP2 mRNA levels in TCGA-LIHC was analyzed (n=360). (B) The association between CCL5 and RELA mRNA levels in TCGA-LIHC was analyzed (n=360). (C, D) The TCGA samples were split into high RELA and low RELA expression groups (50%, n=180); In low RELA group (C) and high RELA group (D), the correlation between CCL5 and PGLYRP2 was analyzed respectively. (E) Localization of PGLYRP2 in Huh7/PGLYRP2 (upper panel) and Hep3B/PGLYRP2 (lower panel) cells was examined using

immunofluorescence assay. (F) The binding activity of PGLYRP2 to CCL5 promoter was assessed by CHIP assay in Huh7/PGLYRP2 cells. (G) Immunohistochemistry assays showed PGLYRP2, CD3 and CD8 protein expression in HCC tissues. (H) The association between CCL5 and DNMT 3A mRNA levels in TCGA-LIHC was analyzed (n=360).  $P > 0.05$  indicates that there is no significant difference. (I) The association between CCL5 and CD3G/CD8A mRNA levels in TCGA-LIHC was analyzed (n=360).

**Fig. S6 PGLYRP2/CCL5 axis regulates tumor immunity.** (A, B) PGLYRP2 or CCL5 was knocked down in stable HCC cell lines Hepa 1-6/PGLYRP2 and Huh7/PGLYRP2. The expression levels of PGLYRP2 and CCL5 in PGLYRP2 or CCL5 silenced stable cell lines Hepa 1-6/PGLYRP2 (A) and Huh7/PGLYRP2 (B) were detected by Real-time PCR. (C) The expression levels of PGLYRP2 and CCL5 in PGLYRP2 or CCL5 silenced stable cell lines Hepa 1-6/PGLYRP2 and Huh7/PGLYRP2 were detected by Western blot. (D) MTT assay of PBMC/Huh7 (Con, PGLYRP2 or PGLYRP2+siPGLYRP2) co-culture system was performed. (E) The cytotoxicity assay of PBMCs on tumor cells was analyzed by incubating PBMCs with Huh7/Con or Huh7/PGLYRP2 with or without 1  $\mu\text{g/ml}$  CCL5 blocking antibody (53405.111, ab10394, Abcam, Cambridge, UK) for 2 h, 4 h and 8 h at an E:T ratio of 10:1. (F) Survival rate of PBMC/Huh7 (Con, PGLYRP2 or PGLYRP2+siPGLYRP2) xenografted BALB/c-nu/nu mice were performed. The results represent at least three independent

experiments and are reported as mean  $\pm$  SEM. \*,  $p < 0.05$ ; \*\*,  $p < 0.001$ ; ns, not significant.

**Fig. S7 Identification of immune effector cells of PGLYRP2-mediated anti-tumor immunity** (A) Depletion of immune cells by intraperitoneally administering 200  $\mu$ g of depleting antibody i.p. twice weekly beginning one day prior to tumor injection.  $1 \times 10^6$  stable Hepa 1-6/PGLYRP2 cells and control cells were injected subcutaneously into the right posterior flanks of 6-week-old immune-competent BALB/c mice. Tumor weight was measured at the end of the study. The depletion of immune cells was confirmed by using flow cytometry analysis. (B) The tumor killing activity of five independent PBMC donors was verified in PBMC-K562 co-culture system at an E:T ratio of 10:1. Cytotoxicity was measured after 2 h, 4 h and 8 h of incubation. (C) Cytotoxicity assay of NK cell line NK-92 was analyzed by incubating target cells Huh7/Con or Huh7/PGLYRP2 with NK92 for 2 h and 4 h at an E:T ratio of 10:1. (D, E) Cytotoxicity assay of cultured NK cells was analyzed by incubating target cells K562 (D), Huh7/Con or Huh7/PGLYRP2 (E) with cultured NK cells for 2 h and 4 h at an E:T ratio of 10:1. (F) Cell subsets of PBMC from healthy donor were identified by flow cytometry. (G) Cell subsets of cultured NK cells (NK-1, NK-2 and NK-3) from healthy donors were identified by flow cytometry. All the results are reported as mean  $\pm$  SEM. \*,  $p < 0.05$ ; \*\*,  $p < 0.001$ ; ns, not significant.

**Fig. S8 Apoptosis assay of PGLYRP2-overexpressed Huh7 and Hepa1-6 cells.** (A) Apoptosis assay was performed with Annexin V-FITC/PI staining in stable Huh7/PGLYRP2, Hepa1-6/PGLYRP2 and corresponding control cells. (B) Statistic analysis showed the percentage of both early (Annexin V+/PI-) and late (Annexin V+/PI+) apoptotic cells. Student's t test was used to compare values. The results represent at least three independent experiments and are reported as mean  $\pm$  SEM. The ns indicates there is no significant difference.

**Table S1 Clinicopathologic features of PGLYRP2 expression in HCC**

| Indexes                   | Total number | PGLYRP2 expression level |            | P value |
|---------------------------|--------------|--------------------------|------------|---------|
|                           |              | High (n=27)              | Low (n=46) |         |
| <b>Average age</b>        |              |                          |            | 0.740   |
| ≥55                       | 36           | 14                       | 22         |         |
| <55                       | 37           | 13                       | 24         |         |
| <b>Sex</b>                |              |                          |            | 0.751   |
| Male                      | 61           | 22                       | 39         |         |
| Female                    | 12           | 5                        | 7          |         |
| <b>Cirrhosis</b>          |              |                          |            | 0.312   |
| Yes                       | 27           | 12                       | 15         |         |
| No                        | 46           | 15                       | 31         |         |
| <b>Tumor size</b>         |              |                          |            | 0.008*  |
| ≤5 cm                     | 31           | 17                       | 14         |         |
| >5 cm                     | 42           | 10                       | 32         |         |
| <b>Tumor number</b>       |              |                          |            | 0.847   |
| =1                        | 67           | 25                       | 42         |         |
| >1                        | 6            | 2                        | 4          |         |
| <b>Histological grade</b> |              |                          |            | 0.011*  |
| I, I-II                   | 9            | 7                        | 2          |         |
| II, II-III, III           | 64           | 20                       | 44         |         |
| <b>TNM stage</b>          |              |                          |            | 0.008*  |
| I-II                      | 39           | 20                       | 19         |         |
| III-IV                    | 34           | 7                        | 27         |         |

Note: - and + staining intensities indicate low level of PGLYRP2 expression; ++ and +++ staining intensities indicate high expression level. \*A  $p$ -value<0.05 was considered statistically significant. The  $p$ -values were calculated using Fisher's test.



**Table S2 Clinical data on the specimen used in IHC, cDNA array and methylation status analysis of PGLYRP2 promoter**

**1. HCC tissue array HLiv-HCC180Sur-01**

| tissue code         | Gender | Age | Life time | Pathological typing                         | Histological grade | TNM stage | Tumor size (cm)         |
|---------------------|--------|-----|-----------|---------------------------------------------|--------------------|-----------|-------------------------|
| RDgLiv07<br>04A0186 | Male   | 67  | 79        | Hepatocellular carcinoma                    | I - II             | T2N0M0    | 3×2.5×2                 |
| RDgLiv07<br>06A0222 | Male   | 62  | 77        | Hepatocellular carcinoma                    | I - II             | T2N0M0    | 4.5×4×3                 |
| RDgLiv07<br>06A0228 | Female | 50  | 11        | Hepatocellular carcinoma                    | II -III            | T2N0M0    | 5.5×5×4                 |
| RDgLiv07<br>09A0236 | Male   | 57  | 43        | Hepatocellular carcinoma,<br>with cirrhosis | II -III            | T2N0M0    | 4×3.5×3                 |
| RDgLiv07<br>09A0239 | Male   | 56  | 32        | Hepatocellular carcinoma,<br>with cirrhosis | II                 | T2N0M0    | 1×1×1,<br>3×3×3         |
| RDgLiv07<br>10A0240 | Female | 54  | 73        | Hepatocellular carcinoma,<br>with cirrhosis | II                 | T2N0M0    | 2×1.5×1.5,<br>1.5×1.5×1 |
| RDgLiv08<br>03A0328 | Male   | 46  | 16        | Hepatocellular carcinoma                    | III                | T3N0M0    | 18×13×7                 |
| RDgLiv08<br>03A0329 | Male   | 52  | 66        | Hepatocellular carcinoma                    | III                | T3N0M0    | 16×14×6                 |
| RDgLiv08<br>07A0380 | Male   | 61  | 62        | Hepatocellular carcinoma                    | I - II             | T1N0M0    | 1.5×1.5×1               |
| RDgLiv08<br>12A0413 | Male   | 54  | 57        | Hepatocellular carcinoma                    | II                 | T2N0M0    | 3.5×3×2.5               |
| RDgLiv08<br>12A0414 | Male   | 48  | 57        | Hepatocellular carcinoma                    | I                  | T2N0M0    | 6×5.5×5                 |
| RDgLiv09<br>01A0432 | Female | 65  | 57        | Hepatocellular carcinoma,<br>with cirrhosis | II                 | T2N0M0    | 7×4×4                   |
| RDgLiv09<br>04A0464 | Male   | 52  | 55        | Hepatocellular carcinoma                    | III                | T3N0M0    | 9×5×3                   |
| RDgLiv09<br>04A0469 | Male   | 55  | 55        | Hepatocellular carcinoma                    | II                 | T2N0M0    | 7×6×5                   |
| D19A056<br>1        | Male   | 40  | 50        | Hepatocellular carcinoma,<br>with cirrhosis | II -III            | T3N0M0    | 9.5×8×5                 |
| D19A056<br>2        | Male   | 59  | 50        | Hepatocellular carcinoma                    | II -III            | T3N0M0    | 13×12×10                |
| D19A058<br>2        | Male   | 63  | 49        | Hepatocellular carcinoma                    | I - II             | T2N0M0    | 7.5×5×4.5               |

|                     |        |    |    |                                          |          |        |                 |
|---------------------|--------|----|----|------------------------------------------|----------|--------|-----------------|
| D19A069<br>0        | Male   | 65 | 35 | Hepatocellular carcinoma                 | II       | T2N0M0 | 7×5×5           |
| D19A069<br>5        | Male   | 47 | 46 | Hepatocellular carcinoma                 | II       | T2N0M0 | 4×3.5×3.5       |
| D19A071<br>5        | Male   | 56 | 44 | Hepatocellular carcinoma, with cirrhosis | I        | T2N0M0 | 5×5×3           |
| D19A086<br>0        | Female | 71 | 41 | Hepatocellular carcinoma, with cirrhosis | II       | T2N0M0 | 4.5×4.5×4       |
| D19A086<br>7        | Male   | 46 | 19 | Hepatocellular carcinoma                 | III      | T2N0M0 | 5.5×4.5×2.5     |
| D19A116<br>9        | Male   | 73 | 32 | Hepatocellular carcinoma                 | I - II   | T3N0M0 | 11×9×7          |
| D19A093<br>1        | Male   | 62 | 39 | Hepatocellular carcinoma                 | II - III | T2N0M0 | 3.5×3×3         |
| D19A128<br>7        | Male   | 72 | 37 | Hepatocellular carcinoma, with cirrhosis | II       | T1N0M0 | 3×2×2           |
| D19A129<br>3        | Female | 47 | 37 | Hepatocellular carcinoma                 | II - III | T2N0M0 | 7.5×5.5×4.5     |
| D19A131<br>1        | Male   | 53 | 20 | Hepatocellular carcinoma                 | II       | T3N0M0 | 10×6×4          |
| RDgLiv07<br>04A0179 | Male   | 45 | 80 | Hepatocellular carcinoma                 | II - III | T3N0M0 | 3×2.5×2         |
| RDgLiv07<br>04A0187 | Male   | 65 | 11 | Hepatocellular carcinoma                 | II - III | T3N0M0 | 9×8×8           |
| RDgLiv07<br>04A0192 | Male   | 38 | 39 | Hepatocellular carcinoma                 | III      | T3N0M1 | 3×2.5×2         |
| RDgLiv07<br>04A0195 | Male   | 58 | 78 | Hepatocellular carcinoma                 | II - III | T2N0M0 | 14×10×7         |
| RDgLiv07<br>04A0207 | Male   | 40 | 77 | Hepatocellular carcinoma                 | II - III | T1N0M0 | 1.8×1.5×1.2     |
| RDgLiv07<br>04A0211 | Male   | 70 | 13 | Hepatocellular carcinoma                 | II       | T3N1M0 | 12×7.5×6        |
| RDgLiv07<br>06A0220 | Male   | 55 | 49 | Hepatocellular carcinoma                 | I - II   | T3N0M0 | 15×8.5×6.5      |
| RDgLiv07<br>06A0231 | Male   | 56 | 4  | Hepatocellular carcinoma                 | III      | T3N0M0 | 1×1×1,<br>7×5×5 |
| RDgLiv07<br>10A0241 | Male   | 51 | 29 | Hepatocellular carcinoma                 | III      | T2N0M0 | 5.5×5.5×3.5     |
| RDgLiv07<br>10A0244 | Female | 58 | 73 | Hepatocellular carcinoma, with cirrhosis | II       | T1N0M0 | 2.5×2.5×2       |

|                     |        |    |    |                                          |         |        |                           |
|---------------------|--------|----|----|------------------------------------------|---------|--------|---------------------------|
| RDgLiv07<br>10A0256 | Male   | 50 | 73 | Hepatocellular carcinoma                 | II      | T2N0M0 | 6×6×5.5                   |
| RDgLiv07<br>10A0258 | Female | 57 | 2  | Hepatocellular carcinoma, with cirrhosis | II -III | T2N0M0 | 4×3.5×3                   |
| RDgLiv08<br>01A0314 | Male   | 57 | 29 | Hepatocellular carcinoma                 | III     | T2N0M0 | 4×4×4,<br>3×3×3           |
| RDgLiv08<br>02A0319 | Male   | 52 | 35 | Hepatocellular carcinoma, with cirrhosis | II      | T3N0M0 | 30×15×10                  |
| RDgLiv08<br>02A0323 | Male   | 43 | 67 | Hepatocellular carcinoma                 | II      | T1N0M0 | 1.5×1×1                   |
| RDgLiv08<br>02A0325 | Female | 48 | 25 | Hepatocellular carcinoma                 | II      | T3N0M0 | 11×6×6                    |
| RDgLiv08<br>02A0327 | Male   | 56 | 4  | Hepatocellular carcinoma                 | III     | T4N0M0 | 13×7×4                    |
| RDgLiv08<br>03A0330 | Male   | 52 | 16 | Hepatocellular carcinoma                 | III     | T3N0M0 | 6×6×6                     |
| RDgLiv08<br>04A0336 | Male   | 56 | 6  | Hepatocellular carcinoma                 | III     | T3N0M0 | 13×11×5                   |
| RDgLiv08<br>04A0338 | Male   | 54 | 17 | Hepatocellular carcinoma                 | II      | T2N0M0 | 4.5×4.5×4                 |
| RDgLiv08<br>04A0340 | Male   | 57 | 11 | Hepatocellular carcinoma, with cirrhosis | II -III | T4N0M0 | 19×18×10                  |
| RDgLiv08<br>04A0343 | Male   | 56 | 14 | Hepatocellular carcinoma, with cirrhosis | I       | T2N0M0 | 4×4×4                     |
| RDgLiv08<br>06A0363 | Female | 72 | 4  | Hepatocellular carcinoma                 | II -III | T3N0M0 | 11×6×5                    |
| RDgLiv08<br>06A0365 | Male   | 43 | 4  | Hepatocellular carcinoma, with cirrhosis | II      | T3N0M0 | 15×13×9                   |
| RDgLiv08<br>08A0385 | Male   | 49 | 5  | Hepatocellular carcinoma, with cirrhosis | III     | T3N0M0 | 9×6×4,<br>2.8×2.5×1       |
| RDgLiv08<br>08A0388 | Male   | 68 | 1  | Hepatocellular carcinoma, with cirrhosis | III     | T3N0M0 | 12×9×9                    |
| RDgLiv08<br>11A0403 | Male   | 42 | 3  | Hepatocellular carcinoma, with cirrhosis | II      | T1N0M0 | 2×1.5×1.5                 |
| RDgLiv08<br>11A0407 | Female | 51 | 22 | Hepatocellular carcinoma,                | II      | T3N0M0 | 5.5×5.5×3,<br>1.5×1.3×1.3 |

|                     |        |    |    |                                                |         |        |           |
|---------------------|--------|----|----|------------------------------------------------|---------|--------|-----------|
| RDgLiv09<br>01A0436 | Male   | 51 | 17 | Hepatocellular<br>carcinoma,<br>with cirrhosis | II      | T3N0M0 | 10×7×7    |
| RDgLiv09<br>02A0454 | Male   | 52 | 30 | Hepatocellular<br>carcinoma                    | II      | T3N0M0 | 14×10×10  |
| RDgLiv09<br>04A0463 | Male   | 57 | 32 | Hepatocellular<br>carcinoma                    | III     | T3N0M0 | 14×9×6    |
| RDgLiv09<br>04A0471 | Male   | 54 | 54 | Hepatocellular<br>carcinoma                    | II      | T2N0M0 | 3×2.5×1.7 |
| RDgLiv09<br>04A0472 | Male   | 51 | 5  | Hepatocellular<br>carcinoma                    | II      | T2N0M0 | 3.5×3×2.5 |
| RDgLiv09<br>04A0475 | Female | 54 | 16 | Hepatocellular<br>carcinoma                    | II      | T2N0M0 | 3×3×2     |
| RDgLiv09<br>04A0487 | Male   | 65 | 4  | Hepatocellular<br>carcinoma                    | II      | T3N0M0 | 13×10×4   |
| RDgLiv09<br>04A0488 | Female | 67 | 54 | Hepatocellular<br>carcinoma                    | II      | T2N0M0 | 4×4×3     |
| RDgLiv09<br>04A0490 | Male   | 54 | 6  | Hepatocellular<br>carcinoma                    | II      | T3N0M0 | 3×2.5×2   |
| RDgLiv09<br>05A0510 | Male   | 56 | 4  | Hepatocellular<br>carcinoma                    | II -III | T3N0M0 | 7×4.5×3   |
| D19A056<br>7        | Male   | 40 | 5  | Hepatocellular<br>carcinoma,<br>with cirrhosis | II      | T3N0M0 | 22×12×6   |
| D19A062<br>3        | Male   | 73 | 47 | Hepatocellular<br>carcinoma                    | II      | T1N0M0 | 3×3×3     |
| D19A062<br>8        | Male   | 56 | 5  | Hepatocellular<br>carcinoma                    | II      | T2N0M0 | 4×4×2.5   |
| D19A068<br>9        | Male   | 38 | 16 | Hepatocellular<br>carcinoma                    | II      | T3N0M0 | 3×4×3     |
| D19A083<br>5        | Male   | 50 | 2  | Hepatocellular<br>carcinoma                    | II      | T3N0M0 | 13×11×8   |
| D19A085<br>6        | Male   | 56 | 37 | Hepatocellular<br>carcinoma                    | II      | T3N0M0 | 6.5×5×4   |
| D19A117<br>3        | Male   | 53 | 38 | Hepatocellular<br>carcinoma,<br>with cirrhosis | II      | T2N0M0 | 6×5×4     |
| D19A117<br>9        | Male   | 63 | 12 | Hepatocellular<br>carcinoma                    | II -III | T2N0M0 | 4×3×2.5   |

## 2. HCC tissue array Hliv-HCC030PG-01

| Tissue code         | Gender | Age | Pathological typing      | Histological grade | Primary organ | Tumor size (cm) |
|---------------------|--------|-----|--------------------------|--------------------|---------------|-----------------|
| CDgLiv05<br>06A0092 | Male   | 61  | Hepatocellular carcinoma | I - II             | Yes           | 4×4×3           |
| CDgLiv08<br>11A0423 | Male   | 63  | Hepatocellular carcinoma | I - II             | Yes           | 4.5×3.5×3       |
| CDgLiv09<br>01A0443 | Male   | 64  | Hepatocellular carcinoma | I - II             | Yes           | 7×7×5           |
| CDgLiv07<br>07A0251 | Male   | 64  | Hepatocellular carcinoma | II                 | Yes           | 11×9×2          |
| CDgLiv07<br>09A0270 | Male   | 34  | Hepatocellular carcinoma | II                 | Yes           | 5×4×4           |
| CDgLiv07<br>11A0293 | Male   | 43  | Hepatocellular carcinoma | II                 | Yes           | 3.4×3.2×2.1     |
| CDgLiv08<br>01A0317 | Male   | 52  | Hepatocellular carcinoma | II                 | Yes           | 4×3.8           |
| CDgLiv08<br>03A0346 | Female | 63  | Hepatocellular carcinoma | II                 | Yes           | 4×3×3           |
| CDgLiv08<br>12A0439 | Female | 56  | Hepatocellular carcinoma | II                 | Yes           | 6×4×4           |
| CDgLiv09<br>01A0442 | Male   | 63  | Hepatocellular carcinoma | II                 | Yes           | 3.5×3×3         |
| CDgLiv09<br>02A0459 | Male   | 53  | Hepatocellular carcinoma | II                 | Yes           | 3.2×3×3         |
| CDgLiv09<br>04A0481 | Male   | 52  | Hepatocellular carcinoma | II                 | Yes           | 10×7×6          |
| CDgLiv08<br>06A0373 | Male   | 42  | Hepatocellular carcinoma | II - III           | Yes           | 6×5×5           |
| CDgLiv07<br>11A0289 | Female | 68  | Hepatocellular carcinoma | III                | Yes           | 4.5×4×4         |
| CDgLiv07<br>11A0291 | Male   | 55  | Hepatocellular carcinoma | III                | Yes           | 6×6×5           |

### 3. HCC tissue array HLivH090Su01

| Tissue code | Gender | Age | Pathological typing      | Histological grade | Distant transfer | Primary organ | Tumor size (cm) |
|-------------|--------|-----|--------------------------|--------------------|------------------|---------------|-----------------|
| D19A1249    | Male   | 53  | Hepatocellular carcinoma | III                | No               | Yes           | 6.5×5.5×5.5     |
| D19A1251    | Male   | 45  | Hepatocellular carcinoma | II                 | No               | Yes           | 8×7.9×7         |
| D19A1253    | Male   | 53  | Hepatocellular carcinoma | II                 | No               | Yes           | 17×16×9         |
| D19A1254    | Male   | 49  | Hepatocellular carcinoma | III                | No               | Yes           | 9×7×7           |
| D19A1261    | Male   | 39  | Hepatocellular carcinoma | II                 | No               | Yes           | 8.5×8×6         |
| D19A1263    | Male   | 51  | Hepatocellular carcinoma | I - II             | No               | Yes           | 7×6×6           |
| D19A1266    | Male   | 69  | Hepatocellular carcinoma | II                 | No               | Yes           | 8×6×6           |
| D19A1267    | Male   | 44  | Hepatocellular carcinoma | II                 | No               | Yes           | 4.5×4.5×3       |
| D19A1203    | Female | 58  | Hepatocellular carcinoma | I - II             | No               | Yes           | 4.7×4×4         |
| D19A1269    | Male   | 51  | Hepatocellular carcinoma | I - II             | No               | Yes           | 5×4×3           |
| D19A1802    | Male   | 45  | Hepatocellular carcinoma | II                 | No               | Yes           | 4×4×3           |
| D19A1800    | Male   | 51  | Hepatocellular carcinoma | III                | No               | Yes           | 2.5×2×2         |
| D19A1798    | Female | 48  | Hepatocellular carcinoma | II                 | No               | Yes           | 3.5×3×3         |
| D19A1799    | Male   | 63  | Hepatocellular carcinoma | II-III             | No               | Yes           | 7×5.5×5         |

#### 4. HCC tissue array OD-CT-DgLiv02-005

| Tissue code         | Gender | Age | Pathological typing      | Histologic al grade | Distant transfer | Primary organ | Tumor size    |
|---------------------|--------|-----|--------------------------|---------------------|------------------|---------------|---------------|
| CDgLiv08<br>01A0344 | Female | 59  | Hepatocellular carcinoma | I                   | No               | Yes           | 5×5×5cm       |
| CDgLiv07<br>04A0204 | Female | 57  | Hepatocellular carcinoma | I - II              | No               | Yes           | 7×8×7cm       |
| CDgLiv07<br>11A0292 | Male   | 45  | Hepatocellular carcinoma | I - II              | No               | Yes           | 2×2×2cm       |
| CDgLiv08<br>04A0369 | Male   | 61  | Hepatocellular carcinoma | I - II              | No               | Yes           | 2.2×1.2×1.2cm |
| CDgLiv07<br>04A0197 | Male   | 71  | Hepatocellular carcinoma | II                  | No               | Yes           | 2.5×2.5×2cm   |
| CDgLiv07<br>04A0200 | Male   | 53  | Hepatocellular carcinoma | II                  | No               | Yes           | 3×3×3cm       |
| CDgLiv08<br>03A0348 | Male   | 50  | Hepatocellular carcinoma | II                  | No               | Yes           | 9×7×6cm       |
| CDgLiv07<br>09A0255 | Male   | 32  | Hepatocellular carcinoma | II - III            | No               | Yes           | 8×5.5×6cm     |
| CDgLiv07<br>12A0298 | Male   | 38  | Hepatocellular carcinoma | III                 | No               | Yes           | 11×9×5cm      |
| CDgLiv08<br>04A0368 | Male   | 71  | Hepatocellular carcinoma | III                 | No               | Yes           | 4×2.5×2cm     |

### 5. cDNA array cDNA-HlivH60PG02

| Tissue code   | Gender | Age | Pathological typing      | Histological grade | TNM stage | History of liver disease | Tumor size (cm)  |
|---------------|--------|-----|--------------------------|--------------------|-----------|--------------------------|------------------|
| D19A1531      | Male   | 61  | Hepatocellular carcinoma | II                 | T3N0M0    | Cirrhosis, Hepatitis B   | 3×5 , 5×6        |
| D19A1541      | Male   | 41  | Hepatocellular carcinoma | II                 | T2N0M0    | Cirrhosis, Hepatitis B   | 2×3              |
| D19A1545      | Male   | 53  | Hepatocellular carcinoma | II                 | T3N0M0    | Cirrhosis, Hepatitis B   | 4×4×5, 5.5×3×1.5 |
| D19A1754      | Female | 23  | Hepatocellular carcinoma | II                 | T2N0M0    |                          | 9                |
| D19A2384      | Male   | 70  | Hepatocellular carcinoma | II                 | T3N0M0    | Cirrhosis, Hepatitis B   | 6                |
| D19A2388      | Male   | 62  | Hepatocellular carcinoma | II                 | T2N0M0    | Cirrhosis, Hepatitis B   | 7                |
| D19A2411      | Male   | 42  | Hepatocellular carcinoma | II                 | T2N0M0    | Cirrhosis, Hepatitis B   | 5×4×4            |
| D19A1144      | Male   | 47  | Hepatocellular carcinoma | II -III            | T2N0M0    | Hepatitis B              | 13.2×8.6         |
| D19A1370      | Male   | 41  | Hepatocellular carcinoma | II -III            | T2N0M0    |                          | 5×4.5×4          |
| D19A1525      | Male   | 68  | Hepatocellular carcinoma | II -III            | T2N0M0    | Cirrhosis, Hepatitis B   | 7                |
| D19A1532      | Male   | 62  | Hepatocellular carcinoma | II -III            | T2N0M0    | Cirrhosis, Hepatitis B   | 6                |
| D19A2079      | Male   | 53  | Hepatocellular carcinoma | II -III            | T3N0M0    | Cirrhosis, Hepatitis B   | 7                |
| D19A2091      | Female | 69  | Hepatocellular carcinoma | II -III            | T3N0M0    | Cirrhosis, Hepatitis B   | 7                |
| D19A2331      | Male   | 59  | Hepatocellular carcinoma | II -III            | T2N0M0    |                          | 4.5×4.5×4        |
| D19A2335      | Female | 60  | Hepatocellular carcinoma | II -III            | T2N0M0    |                          | 4×3×3            |
| D19A2392      | Male   | 53  | Hepatocellular carcinoma | II -III            | T2N0M0    | Cirrhosis, Hepatitis B   | 10×8             |
| D19A2404      | Female | 65  | Hepatocellular carcinoma | II -III            | T3N0M0    | Cirrhosis, Hepatitis B   | 7                |
| D19A2406      | Male   | 55  | Hepatocellular carcinoma | II -III            | T2N0M0    | Cirrhosis, Hepatitis B   | 6                |
| 729406/12-29  | Male   | 66  | Hepatocellular carcinoma | II -III            | T2N0M0    |                          | 1.5              |
| 744588/12-471 | Male   | 73  | Hepatocellular carcinoma | II -III            | T2N0M0    |                          | 2.5              |



|          |        |    |                          |     |        |             |       |
|----------|--------|----|--------------------------|-----|--------|-------------|-------|
| D19A2634 | Female | 54 | Hepatocellular carcinoma | III | T4N0M1 |             | 12×13 |
| D19A0886 | Male   | 42 | Hepatocellular carcinoma | IV  | T4N0M0 | Hepatitis B | 7.1×5 |

**6. three HCC samples used in analysis of methylation status of PGLYRP2 promoter**

| Patient | Tumor_type           | Gender | Age_at_initial_pathologic_diagnosis | Histological_type        | Primary_tumor_pathologic_spread              |
|---------|----------------------|--------|-------------------------------------|--------------------------|----------------------------------------------|
| HCC001  | Primary liver cancer | MALE   | 59                                  | Hepatocellular Carcinoma | Invasive type, differentiated adenocarcinoma |
| HCC002  | Primary liver cancer | FEMALE | 62                                  | Hepatocellular Carcinoma | Invasive type, differentiated adenocarcinoma |
| HCC003  | Primary liver cancer | MALE   | 40                                  | Hepatocellular Carcinoma | Invasive type, differentiated adenocarcinoma |

| <b>Tumor_stage</b> | <b>History_of_hepatitis<br/>b_infection</b> | <b>history_of_hepatitis<br/>c_infection</b> | <b>alcohol<br/>consumption</b> | <b>AFP level</b> | <b>vital_status</b> | <b>Written informed<br/>consent for publication<br/>of their clinical details</b> |
|--------------------|---------------------------------------------|---------------------------------------------|--------------------------------|------------------|---------------------|-----------------------------------------------------------------------------------|
| T4aN0M0; IIB       | NO                                          | NO                                          | YES                            | 400              | LIVING              | YES                                                                               |
| T4N1M0; III        | YES                                         | NO                                          | NO                             | 218              | DEAD                | YES                                                                               |
| T4N1M1; III        | YES                                         | YES                                         | YES                            | 3510             | DEAD                | YES                                                                               |

**Table S3 Primer sets and siRNA sequences**

| <b>Primer sets for Bisulfite DNA sequencing</b> |                                     |
|-------------------------------------------------|-------------------------------------|
| Primer name                                     | Sequence                            |
| PGLYRP2 promoter 33F                            | 5'-TATTTGAGGTTGGGAGTTTGAGATTAG-3'   |
| PGLYRP2 promoter 767R                           | 5'-GGGGTTGAGTTTGAGTGTGTTAGGAT-3'    |
| PGLYRP2 promoter 671F                           | 5'-AGGTGGAGGTTGTAGTGAGTTGAGAT-3'    |
| PGLYRP2 promoter 1295R                          | 5'-TGTGGGTTGAGGTAGGGATTAGG-3'       |
| PGLYRP2 promoter 1257F                          | 5'-TTAGTTATGGGTATTTGGAGAAGAGGA-3'   |
| PGLYRP2 promoter 2102R                          | 5'-ATTTATTTGTTTTGGTTTTTAAAGTGTTG-3' |
| <b>Primer sets for immune markers</b>           |                                     |
| Primer name                                     | Sequence                            |
| hCD3G RT_F                                      | 5'-GGAATCTGGGAAGTAATGCCAA-3'        |
| hCD3G RT_R                                      | 5'-TCAATGCAGTTCTGACACATTCT-3'       |
| hCD4 RT_F                                       | 5'-CTTCTGGTGCTGCAACTGG-3'           |
| hCD4 RT_R                                       | 5'-GCTGTACAGGTCAGTTCC-3'            |
| hCD8A RT_F                                      | 5'-CTTACCAGTGACCGCCTTG-3'           |
| hCD8A RT_R                                      | 5'-CACTTCAGTCCACTGTCTC-3'           |
| Hcd14 RT_F                                      | 5'-GACCTAAAGATAACCGGCACC-3'         |
| hCD14 RT_R                                      | 5'-GCAATGCTCAGTACCTTGAGG-3'         |
| hCD68 RT_F                                      | 5'-GGAAATGCCACGGTTCATCCA-3'         |
| hCD68 RT_R                                      | 5'-TGGGGTTCAGTACAGAGATGC-3'         |
| hCD22 RT_F                                      | 5'-CACCTCAATGACAGTGGTCAG-3'         |
| hCD22 RT_R                                      | 5'-TGGATCGGATACCCATAGCAG-3'         |
| hCD11b RT_F                                     | 5'-ACTTGCAAGTGAACACGTATG-3'         |
| hCD11b RT_R                                     | 5'-TCATCCGCCGAAAGTCATGTG-3'         |
| hFOXP3 RT_F                                     | 5'-GTGGCCCGGATGTGAGAAG-3'           |
| hFOXP3 RT_R                                     | 5'-GGAGCCCTTGTCGGATGATG-3'          |
| C2 RT_F                                         | 5'-CCTTGAATGGGAGCAAACACTGAAC-3'     |
| C2 RT_R                                         | 5'-GATTGATGTGAAAGTCTCGTGCC-3'       |
| C3 RT_F                                         | 5'-GCTGCTCCTGCTACTAACCCA-3'         |
| C3 RT_R                                         | 5'-AAAGGCAGTTCCTCCACTTT-3'          |
| <b>Primer sets for chemokines</b>               |                                     |
| Primer name                                     | Sequence                            |
| CCL5 RT_F                                       | 5'-CCAGCAGTCGTCTTTGTCAC-3'          |
| CCL5 RT_R                                       | 5'-CTCTGGGTTGGCACACACTT-3'          |
| Midkine RT_F                                    | 5'-CGCGGTCGCCAAAAGAAAG-3'           |
| Midkine RT_R                                    | 5'-TACTTGCAAGTCGGCTCCAAAC-3'        |
| CXCL7 RT_F                                      | 5'-GTAACAGTGCAGACCACTTC-3'          |
| CXCL7 RT_R                                      | 5'-CTTTGCCTTCGCCAAGTTTC-3'          |
| CXCL4 RT_F                                      | 5'-GTCCGTCAGGCACATCA-3'             |
| CXCL4 RT_R                                      | 5'-GCTTGCAGGTCCAAGCAAATT-3'         |

|                 |                               |
|-----------------|-------------------------------|
| CXCL12 RT_F     | 5'-ATTCTCAACACTCCAAACTGTGC-3' |
| CXCL12 RT_R     | 5'-ACTTTAGCTTCGGGTCAATGC-3'   |
| CCL21 RT_F      | 5'-GTTGCCTCAAGTACAGCCAAA-3'   |
| CCL21 RT_R      | 5'-AGAACAGGATAGCTGGGATGG-3'   |
| Chemerin RT_F   | 5'-AGAAACCCGAGTGCAAAGTCA-3'   |
| Chemerin RT_R   | 5'-AGAACTGGGTCTCTATGGGG-3'    |
| IL16 RT_F       | 5'-GCCGAAGACCCTTGGGTTAG-3'    |
| IL16 RT_R       | 5'-GCTGGCATTGGGCTGTAGA-3'     |
| Fibrinogen RT_F | 5'-AGTGATTCAGAACCGTCAAGAC-3'  |
| Fibrinogen RT_R | 5'-CATCCTGGTAAGCTGGCTAATTT-3' |

### Primer sets for ChIP analysis

| Primer name            | Sequence                         |
|------------------------|----------------------------------|
| CCL5 promoter_F        | 5'-ATTCTACTGAGTGGGTGGA-3'        |
| CCL5 promoter_R        | 5'-GTGTCATGGTGGTTTGCTGTA-3'      |
| PGLYRP2 promoter-440F  | 5'-GGCATTACTTACCTCTGGCTTTC-3'    |
| PGLYRP2 promoter-315R  | 5'-GGGTCCTGGTTACATGGCTGT-3'      |
| PGLYRP2 promoter-736F  | 5'-GTTTAGGATCTTATCTACCTCCATCA-3' |
| PGLYRP2 promoter-614R  | 5'-TCAACAAATGTTCCCGAGTG-3'       |
| PGLYRP2 promoter-1516F | 5'-CAGCCTGGGAGACAGAGCA-3'        |
| PGLYRP2 promoter-1362R | 5'-GTGACGCAATCATGGTTCCT-3'       |
| PGLYRP2 promoter-1741F | 5'-CAGGCACGGTGGCTCAT-3'          |
| PGLYRP2 promoter-1491R | 5'-AGGGTCTTGCTCTGCTCCC-3'        |

### Primer sets for construction of promoter-luciferase reporter plasmids

| Primer name                    | Sequence                                     |
|--------------------------------|----------------------------------------------|
| CCL5 promoter luc -1841_KpnI F | 5'-GGGGTACCCCTGACTCTTGATTCTCCCG-3'           |
| CCL5 promoter luc -500_KpnI F  | 5'-GGGGTACCC AAGTGTCAGCATGTATCTACTAATAA-3'   |
| CCL5 promoter luc -1_XhoI R    | 5'-CCGCTCGAGCGGGCAGAACGTGCAGGTTTGTT-3'       |
| CCL5 promoter luc -500_XhoI R  | 5'-CCGCTCGAGCGGTTATTAGTAGATACATGCTGACACTT-3' |
| PGLYRP2 promoter luc_SacI F    | 5'-CGAGCTCGCATTGTCTTAGTTGGGCTTCC-3'          |
| PGLYRP2 promoter luc_XhoI R    | 5'-CCGCTCGAGCGGCATGATTGTGGGTCCTGCA-3'        |

### Primer sets for detection of mycoplasma contamination

| Primer name                          | Sequence                        |
|--------------------------------------|---------------------------------|
| Forward primers                      |                                 |
| MF (for six species of mycoplasma)   | 5'-TCTGAAT(C/T)TGCCGGGACCACC-3' |
| PF (for M. pirum only)               | 5'-GGAAAATGTTATTTTGACGGAACCT-3' |
| AF (for A. laidlawii only)           | 5'-GGAATCCCGTTTGAAGATAGGA-3'    |
| Reverse primer                       |                                 |
| MR (for eight species of mycoplasma) | 5'-CTTCCATCACGGTACTGGTTCCT-3'   |

### siRNA sequences

| siRNA name | Sequence |
|------------|----------|
|------------|----------|

---

|             |                               |
|-------------|-------------------------------|
| siDNMT1_1   | 5'- GCAGGCGGCTCAAAGATTT-3'    |
| siDNMT1_2   | 5'- GCTTCAGTGTGTACTGTAA-3'    |
| siDNMT1_3   | 5'- GCTTCAATTCGCGCACCTA-3'    |
| siDNMT3a_1  | 5'- CCATGTACCGCAAAGCCAT-3'    |
| siDNMT3a_2  | 5'- CCAGATGTTCTTCGCTAAT-3'    |
| siDNMT3a_3  | 5'- GCATCCACTGTGAATGATA-3'    |
| siDNMT3b_1  | 5'- CCAAAGCTCTCCGGGAAA-3'     |
| siDNMT3b_2  | 5'- CCTCAAGACAAATTGCTAT-3'    |
| siDNMT3b_3  | 5'- CCATGAAGGTTGGCGACAA-3'    |
| siPGLYRP2_1 | 5'- GGCUGUACCACUUUCUGCUTT-3'  |
| siPGLYRP2_2 | 5'- GACCAUGGCCUCCUCAUTT-3'    |
| siPGLYRP2_3 | 5'- CCUGCUCUCCCAGUAUUUAUTT-3' |
| siCCL5_1    | 5'- GCCCACGUCAAGGAGUAUUTT-3'  |
| siCCL5_2    | 5'- CCAAUCUUGCAGUCGUGUUTT-3'  |
| siCCL5_3    | 5'- GGGUUCAAGAAUACAUCAATT-3'  |

---

## References

1. Shi M, Zhang Y, Liu L, Zhang T, Han F, Cleveland J, Wang F, et al. MAP1S Protein Regulates the Phagocytosis of Bacteria and Toll-like Receptor (TLR) Signaling. *J Biol Chem* 2016;291:1243-1250.
2. Shi M, Wang S, Yao Y, Li Y, Zhang H, Han F, Nie H, et al. Biological and clinical significance of epigenetic silencing of MARVELD1 gene in lung cancer. *Sci Rep* 2014;4:7545.
3. Narumi K, Miyakawa R, Ueda R, Hashimoto H, Yamamoto Y, Yoshida T, Aoki K. Proinflammatory Proteins S100A8/S100A9 Activate NK Cells via Interaction with RAGE. *J Immunol* 2015;194:5539-5548.
4. Zhang H, Hua Y, Jiang Z, Yue J, Shi M, Zhen X, Zhang X, et al. Cancer-associated Fibroblast-promoted LncRNA DNMT3OS Confers Radioresistance by Regulating DNA Damage Response in Esophageal Squamous Cell Carcinoma. *Clin Cancer Res* 2018.
